1 **Metagenomic diagnosis and pathogenic network profile of SARS-CoV-2 in patients co-**  
2 **morbidly affected by type 2 diabetes**

3

4

5 **Keywords:**

6 Meta-transcriptomic analysis, SARS-CoV-2, COVID-19, Type 2 diabetes mellitus, Probiotic.

7 Short title: Meta-transcriptomic analysis of SARS-CoV-2 diabetic patients

8 Authors Information:

9 Hassan M. Al-Emran<sup>1#</sup>, M. Shaminur Rahman<sup>2#</sup>, Md. Shazid Hasan<sup>3</sup>, A. S. M. Rubayet Ul  
10 Alam<sup>3</sup>, Ovinu Kibria Islam<sup>3</sup>, Ajwad Anwar<sup>2</sup>, Iqbal Kabir Jahid<sup>3,4\*</sup>, M. Anwar Hossain<sup>2,4,5\*</sup>

11

12 1 Department of Biomedical Engineering, Jashore University of Science and Technology,  
13 Jashore-7408, Bangladesh

14 2 Department of Microbiology, University of Dhaka, Dhaka-1000, Bangladesh

15 3 Department of Microbiology, Jashore University of Science and Technology, Jashore-7408,  
16 Bangladesh

17 4 Genome Center, Jashore University of Science and Technology, Jashore-7408, Bangladesh

18 5 Vice-Chancellor, Jashore University of Science and Technology, Jashore-7408, Bangladesh

19

20

21 **# Authors contributed equally to this manuscript**

22

23 **\*Corresponding authors**

24 Prof. M. Anwar Hossain: [hossaina@du.ac.bd](mailto:hossaina@du.ac.bd),

25 Prof. Md. Iqbal Kabir Jahid: [ikjahid\\_mb@just.edu.bd](mailto:ikjahid_mb@just.edu.bd),

## 26 **Abstract**

### 27 Background

28 The mortality of COVID-19 disease is very high among males or elderly or individuals having  
29 comorbidities with obesity, cardiovascular diseases, lung infections, hypertension, and/or  
30 diabetes. Our study characterizes SARS-CoV-2 infected patients' metagenomic features with or  
31 without type 2 diabetes to identify the microbial interactions associated with its fatal  
32 consequences.

### 33 Method

34 This study compared the baseline nasopharyngeal microbiome of SARS-CoV-2 infected diabetic  
35 and non-diabetic patients with controls adjusted with age and gender. The mNGS were  
36 performed using Ion GeneStudio S5 Series and the data were analyzed by the Vegan-package in  
37 R.

### 38 Results

39 All three groups possessed significant bacterial diversity and dissimilarity indexes ( $p < 0.05$ ).  
40 Spearman's correlation coefficient network analysis illustrated 183 significant positive  
41 correlations and 13 negative correlations of pathogenic bacteria ( $r = 0.6-1.0$ ,  $p < 0.05$ ), and 109  
42 positive correlations among normal-flora and probiotic bacteria ( $r > 0.6$ ,  $p < 0.05$ ). The SARS-  
43 CoV-2 diabetic group exhibited a significant increase of pathogens ( $p < 0.05$ ) and opportunistic  
44 pathogens ( $p < 0.05$ ) with a simultaneous decrease of normal-flora ( $p < 0.05$ ). The molecular  
45 docking analysis of Salivaricin, KLD4 (alpha), and enterocin produced by several enriched  
46 probiotic strains presented strong binding affinity with Shiga toxin, outer membrane proteins  
47 (ompA, omp33) or hemolysin.

### 48 Conclusion

49 The dysbiosis of the bacterial community might be linked with severe consequences of COVID-  
50 19 infected diabetic patients, although few probiotic strains inhibited numerous pathogens in the  
51 same pathological niches. This study suggested that the promotion of normal-flora and probiotics  
52 through dietary changes and reduction of excessive pro-inflammatory states by preventing  
53 pathogenic environment might lead to a better outcome for those co-morbid patients.

54 **Introduction:**

55 Severe acute respiratory syndrome coronavirus-2 (SARS-CoV-2) is the etiological root of the  
56 COVID-19 pandemic, which has affected over 83 million people worldwide in 2020 <sup>1</sup>. The virus  
57 expresses itself with highly variable severity, ranging from no outward symptoms to severe  
58 respiratory distress <sup>2</sup>. One of the most common questions in the scientific community, why some  
59 patients are asymptomatic and others (especially co-morbid patient) have fatal consequences,  
60 remains largely unknown. The mortality rate of COVID-19 is very high among males or elderly  
61 or individuals having comorbidity with obesity, cardiovascular diseases, lung infections,  
62 hypertension, and/or diabetes. The SARS-CoV-2 mortality was 50% in males and 43% in  
63 females among ICU patients in Lombardy, Italy <sup>3</sup>. The incidence of mortality is 12.2/1000  
64 among male ICU patients than 9.9/1000 among female ICU patients per day in that city. SARS-  
65 CoV-2 infected diabetic patients' mortality is 7.8% compared to 2.7% in non-comorbid patients  
66 in China <sup>4</sup>. In Italy, 29.8% of the SARS-CoV-2 infected diabetic patients died in May 2020. The  
67 study found that the risk factors of death increased by 3.2 times from SARS-CoV-2 infection  
68 when associated with diabetes <sup>5</sup>. Considering the transmission rate of this infection and that over  
69 463 million people are already afflicted with hyperglycemia <sup>6</sup>, adequate research into  
70 management of SARS-CoV-2 infection in diabetic patients is required for public safety. Almost  
71 2 million people died in 2020 so far, and the outcome of this pandemic can be far more  
72 disastrous than that. The genetic sequences of SARS-CoV-2 is largely analyzed. As of 31<sup>st</sup> of  
73 December 2020, a total of 254,153 whole-genome sequences of SARS-CoV-2 have been  
74 performed <sup>7</sup>; however, the pathogenicity, carriage information, and the interactions with  
75 commensals or opportunistic bacteria of this virus are still unclear. What's more, the  
76 development of respiratory coinfections is reported to be associated with COVID-19 disease  
77 severity and fatality in many cases <sup>8, 9, 10</sup>.

78 Metagenomic analysis is popularly used to understand the diversity and pathogenesis of  
79 microbial populations in a group of subjects. However, metagenomics based on next-generation  
80 sequencing (mNGS) is rarely applied to the clinical samples of SARS-CoV-2 <sup>4, 11, 12</sup>. This  
81 technology can be used to uncover all microbiome interacting in the same pathological niche  
82 which leads to ultimate pathophysiological conditions. The present study aims to perform meta-  
83 transcriptomic and in-depth bioanalysis to characterize SARS-CoV-2 diabetic and non-diabetic

84 patients compared with controls to identify the microbial interaction associated with the fatal  
85 consequences.

86 **Methods:**

87 **Patients**

88 Seven SARS-CoV-2 positive samples and four SARS-CoV-2 negative controls were included in  
89 this study. All positive cases were selected from the continuous surveillance at the Genome  
90 Center, Jashore University of Science and Technology covering four districts of Bangladesh,  
91 Jashore, Jhenaidah, Magura, and Narail authorized by the Directorate General of Health  
92 Services, Bangladesh, for the screening of COVID-19. Among those seven positive cases, three  
93 patients had a history of type 2 diabetes with two reported deaths. Four age and sex-matched  
94 subjects were included in this study, as healthy (N=2) controls and unknown etiology controls  
95 (N=2), confirmed as SARS-CoV-2 negative by rt-PCR. Both healthy controls have no history of  
96 fever or other illness or uptake of antibiotics in the last six months. Among them, one has type 2  
97 diabetes mellitus and the other does not have any chronic health complications. The unknown  
98 etiology controls were SARS-CoV-2 negative, of these, one has hypertension, renal malfunction  
99 and died. Three of those four had SARS-CoV-2 antibody-negative tested by All Check COVID-  
100 19 IgG/IgM antibody assay kit (CALTH Inc., Republic of Korea) except the deceased patient.

101 **Metagenomic NGS sequencing**

102 Total nucleic acids were extracted from 300  $\mu$ L of nasopharyngeal samples and eluted with 60  
103  $\mu$ L sterile RNase-free water using a commercial kit (Zymo total nucleic acid, USA). Total NA  
104 concentration was assayed by Qubit RNA HS Assay Kit (Thermo Fisher Scientific, USA) with  
105 Qubit 4 Fluorometer. The extracts were enriched and processed for library preparation using kit  
106 Ion Total RNA-Seq Kit v2.0 (Thermo Fisher Scientific, USA) according to the manufacturer's  
107 instructions with a minor modification. In brief, RNA fragmentation was performed using RNase  
108 III treatment for 3 minutes at 37°C following the magnetic bead cleanup to optimize the library  
109 size at about 200 bp. After adapter ligation of each sample, cDNA was prepared and Ion  
110 Xpress™ RNA-Seq Barcode BC primers (Thermo Fisher Scientific, USA) were added. The  
111 amplification of the barcoded cDNA was extended to 18 cycles instead of 16 due to low  
112 concentration nucleic acid in the samples. The final concentrations of the libraries were diluted  
113 into 200 picomolar (pM) instead of 100 pM as suggested in the manufacturer's protocol. One  
114 extraction control with sterile water and 11 unknown samples were used for the library  
115 preparation. In three mNGS run, four equimolar libraries were pooled for the preparation of

116 template-positive Ion Sphere™ Particles (ISPs) using the Ion 520™ & Ion 530™ Kit – OT2  
117 (Thermo Fisher Scientific, USA) on the Ion One Touch™ 2 System (Thermo Fisher Scientific,  
118 USA). Template-positive ISPs were enriched on Ion One Touch™ ES system (Thermo Fisher  
119 Scientific, USA). The enriched template-positive ISPs and control ISPs were loaded in Ion  
120 520/530™ chip and sequenced with the next-generation sequencing in the Ion S5™ systems  
121 (Thermo Fisher Scientific, USA). The data outputs were analyzed using the automated,  
122 streamlined Torrent Suite software (v5.10.0). The primary baseline data were obtained after  
123 removing duplicated reads, the average quality scores below Q20, low-quality 3-end reads and  
124 adapter sequences.

125 The CGView Server ([http://stothard.afns.ualberta.ca/cgview\\_server/](http://stothard.afns.ualberta.ca/cgview_server/)) was used to construct the  
126 circular ring of SARS-CoV-2 genome comparison using the blastn<sup>13</sup> and SARS-CoV-2 isolate  
127 Wuhan-Hu-1 (NC\_045512.2) was used as a reference. Average nucleotide identity (ANI) was  
128 calculated using jSpecies<sup>14</sup> to compare the SARS-CoV-2 genome with the reference genome.

### 129 **Bioinformatics processing and taxonomic assignment**

130 The Binary Alignment Map (bam) files were transferred to FASTQ format through SAMtools<sup>15</sup>  
131 followed by filtering through BBDuk<sup>16,17</sup> (with options `ftm = 5, k = 21, mink = 6, minlen = 30,`  
132 `ktrim = r, qtrim = rl, trimq = 20, overwrite = true`) to remove all low-quality sequences. On  
133 average, 1.34 million reads per sample (maximum=3.18 million, minimum=0.45 million) passed  
134 the quality control step (Supplementary Data 1). The host sequences from the trimmed files were  
135 removed by aligning to the human genome (hg38) by using Burrows-Wheeler Aligner (BWA)<sup>18</sup>  
136 and SAMtools<sup>15</sup>. The taxonomic assignment has been done by Kraken2<sup>19</sup> with NCBI RefSeq  
137 Release 201 database (Bacterial, Viral, Archaeal, and Fungal). Less than 100 hits were not  
138 considered for bacteria and fungus, and less than 10 hits were not considered for virus and archaea  
139 for analysis. Data normalization was performed by previously described methods by multiplying  
140 the mean with the proportion<sup>20</sup>.

### 141 **Statistical analyses**

142 The alpha diversity of microbial communities among different groups were compared by  
143 calculating the Shannon and Simpson 1-D diversity indexes, Observed, and the Chao-1 richness  
144 index using the “Vegan” package in R. The non-parametric test Kruskal-Wallis rank-sum test  
145 was used to evaluate alpha diversity and the pairwise Wilcoxon rank-sum test was used to assess

146 pairwise comparison in different groups. Beta-diversity (PCoA) was determined using the Bray–  
147 Curtis dissimilarity index, using permutational multivariate analysis of variance  
148 (PERMANOVA), to estimate a p-value for differences among the study groups. Phyloseq and  
149 vegan packages were employed for those statistical analyses<sup>21</sup>. Spearman’s correlation  
150 coefficient and significance tests were calculated using the R package Hmisc. A correlation  
151 network was constructed and visualized with Gephi (ver. 0.9.2). A quantitative analysis of  
152 comparative RNA-seq data using shrinkage estimators for dispersion and fold change was  
153 employed for differential bacterial species with a statistical significance (q-value) <0.01 and  
154 absolute value of log<sub>2</sub> (Fold Change) > 3 using DESeq2 (v4.0). The Benjamini-Hochberg  
155 correction was used to obtain FDR adjusted p-values (q-values) for multiple hypothesis testing  
156<sup>22</sup>.

157

### 158 **Determination of protein structures and their binding affinity**

159 The SWISS-MODEL homology modeling webtool and I-TASSER were utilized for generating  
160 the three-dimensional (3D) structures of the extracellular toxin protein of the probiotics or outer  
161 membrane protein of the pathogen found in our study. We employed CPORT to find out the  
162 active and passive protein-protein interface residues of the proteins and peptides. The molecular  
163 docking of the bacteriocin and virulent protein of the pathogens were performed using the  
164 HADDOCK (v2.4) to evaluate the interaction. The binding affinity of the twenty-four docked  
165 complexes was predicted using the PRODIGY.

### 166 **Ethical Approval**

167 Ethical approval to conduct this metagenomic study was granted by the Ethical Review  
168 Committee of the Jashore University of Science and Technology (ERC no:  
169 ERC/FBST/JUST/2020-41). Informed consent was taken from all the COVID-19 positive  
170 patients and healthy volunteers.

171 **Results:**

172 All 11 study subjects were divided into three groups, the control group (N=4), SARS-CoV-2  
173 positive group without any history of comorbidity (N=4) and SARS-CoV-2 positive diabetic  
174 group. There was no significant difference in age and BMI index in all groups (p-value 0.20 And  
175 0.49 respectively). The detailed patient demography with symptoms, severity, and outcomes  
176 were described in detail in supplementary table s1.

177 **SARS-CoV-2 RNA quantification and genomic data analysis**

178 Metagenomic sequence data analysis retrieved three complete (GISAID Accession ID:  
179 EPI\_ISL\_746318, EPI\_ISL\_746319 and EPI\_ISL\_746323) and one partially complete genome  
180 sequences of SARS-CoV-2 out of 7 positive samples. Their phylogenetic GISAID clades were  
181 GH (Spike D614G, N S194L, NS3 Q57H, NSP2 S263F, NSP3 P74L, NSP12 P323L), G (Spike  
182 D614G, N G204R, N R203K, NS3 Q57H, NSP2 I120F, NSP12 P323L, NSP15 R138C) and GR  
183 (Spike D614G, E N66B, N G204R, N R203K, NS3 D210B, NS3 P42L, NS6 E55G, NSP2 I120F,  
184 NSP3 D1121B, NSP12 N209B, NSP12 P323L, NSP13 L428F). The partial and complete  
185 sequences of SARS-CoV-2 were plotted and visualized in a circular ring (Figure s1). The  
186 complete genomes were aligned with the reference genome of SARS-CoV-2 isolate Wuhan-Hu-  
187 1 (NC\_045512.2) and the aligned nucleotide was found 86%, 99% and 98% with the reference  
188 genome.

189 In all seven SARS-CoV-2 positive samples, the average RNA copies were 231,375 among  
190 outpatients, 198 among ICU patients and 2,600 among departed patients. No significant  
191 relationship was found between the RNA copies and the severity of the disease (Data not  
192 shown).

193 **Microbial diversity and dissimilarity index**

194 The comprehensive assessment of microbial population on the host traits using  $\alpha$ -diversity-based  
195 association analysis found diverse microbial populations in all three groups of samples, however,  
196 they were statistically nonsignificant. The microbial diversity of the control, SARS-CoV-2 non-  
197 diabetic and SARS-CoV-2 diabetic groups were non-significant in Shannon (p=0.18), Simpson  
198 (p=0.23), Observed (p=0.15) or Chao (p=0.19) (Figure s2). Visualization of community  
199 compositions was observed by the Principal Coordinates analysis of Bray-Curtis indicated a  
200 significant dissimilarity index in those groups [ PERMANOVA: Pseudo-F =1.77, p= 0.047). The



201 control group and SARS-CoV-2 non-diabetic group tended to take a position in the middle of the  
202 plot, unlike the SARS-CoV-2 diabetic group. Data from a deceased patient in this co-morbid  
203 group was even more scattered. The number of taxonomic units (species) in the control, SARS-  
204 CoV-2 non-diabetic and diabetic group were 134, 120, and 162, respectively. More than 14%  
205 were shared by all three groups and more than 18% were overlapped between SARS-CoV-2  
206 positive diabetes and non-diabetes group (Figure s3).

### 207 **Bacterial diversity and dissimilarity index**

208 The bacterial populations on the host traits were also assessed by  $\alpha$ -diversity-based association  
209 analysis among the three groups and the Shannon diversity index exhibited significant bacterial  
210 diversity ( $p=0.05$ ). However, Simpson ( $p=0.09$ ), Observed ( $p=0.18$ ) or Chao ( $p=0.18$ ) diversity  
211 index differ insignificantly (Figure 1). The Principal Coordinates analysis of Bray-Curtis index  
212 PERMANOVA analysis found significant (PERMANOVA: Pseudo-F=2.012,  $p=0.02$ )  
213 dissimilarities in bacterial species among those groups.

214 At phyla level, Firmicutes were the most abundant in all three groups following Bacteroidetes  
215 and Proteobacteria. Fusobacteria were abundant only in the control group (Figure s4). This study  
216 identified 207 bacterial species among all cases, of which 22 were pathogens, 30 were  
217 opportunistic pathogens, 20 were normal-flora, 8 were probiotic and 127 were commensals. The  
218 two-way ANOVA analysis found that 41% (9/22) of the pathogens, 47% (14/30) of the  
219 opportunistic pathogens, 20% (4/20) of the normal-flora, 25% (2/8) of the probiotics and 20%  
220 (25/127) of the commensals were differing significantly between the groups (Table s2).

### 221 **Abundance of pathogens, opportunistic pathogens, normal-flora and probiotics**

222 The most abundant species were *Clostridium botulinum*, *Bacillus cereus*, *Prevotella*  
223 *melaninogenica*, *Escherichia coli*, *Staphylococcus aureus*, *Prevotella oris*, *Proteus mirabilis*,  
224 *Pasteurella multocida*, *Lacrimispora sphenoides*, *Tennerella forsythia*, *Salmonella enterica* and  
225 *Alkalihalobacillus pseudofirmus* present in all groups. The SARS-CoV-2 positive diabetic group  
226 consisted of 41 pathogens/opportunistic pathogens (Figure 2A and 2B). Of which, *Acinetobacter*  
227 *nosocomialis*, *Shigella flexneri*, *Bordetella pertussis*, *Dialister pneumosintes*, *Sterptococcus*  
228 *orlis*, *E. fergusonia*, *Achoromobacter sp.* *Selenomonas sp.*, *Cutibacterium acnes*,  
229 *Dolosigranulum pigrum*, *Pseudomonas aeruginosa* and *Stenotrophomonas maltophilia* were  
230 present solely in that group. Furthermore, *K. pneumoniae*, *E. coli*O157:H7, *Yersinia pestis*,

231 *Porphyromonas* and *Enterobacter* were present in both SARS-CoV-2 positive diabetic and non-  
232 diabetic groups. In contrast to that, *Neisseria meningitidis*, *Haemophilus pittmaniae* and  
233 *Streptococcus parasanguinis* were present only in the control group. Moreover, 12 out of 20  
234 species of normal-flora were solely found in the control group, although they were absent in both  
235 SARS-CoV-2 positive diabetic and non-diabetic group. Only three species of normal-flora were  
236 common in all groups and four species of normal-flora were present in both the control and the  
237 SARS-CoV-2 positive diabetic group, the rest was found only in the SARS-CoV-2 diabetic  
238 group (Figure 2C). All known probiotic species of *Streptococcus*, *Lactobacillus*, *Enterococcus* or  
239 *Bifidobacterium* were absent in the control group.

240 The DESeq2 RNA sequence data analysis illustrated the difference of bacterial species between  
241 the groups (Figure 2D, 2E and 2F). Several pathogen, opportunistic pathogens and normal-flora  
242 differ significantly SARS-CoV-2 diabetic and non-diabetic group compared to control  
243 (Benjamini-Hochberg corrected  $p < 0.05$ ) (Figure 2D, 2E).

#### 244 **Networking of bacteria**

245 Spearman's correlation coefficients analyses illustrated 183 significant positive correlations with  
246  $r$  range of 0.6 to 1 ( $P < 0.05$ ) among all pathogen and opportunistic pathogen. *Pseudomonas*  
247 *aeruginosa* positively associated with 14 other pathogenic bacteria including *Dialister*  
248 *pneumosintes*, *E. coli* O157:H7, *Prevotella intermedia*, *Acinetobacter nosocomialis* and  
249 synergistically correlated with *Clostridium botulinum*. *D. pneumosintes* was positively associated  
250 with 12 other pathogenic bacteria. The increasing abundance of *Tennerella forsythia* in SARS-  
251 CoV-2 diabetic group compared to control was also associated with 11 other pathogenic bacteria.  
252 *K. pneumoniae* was positively associated with *Yersinia pestis*, *E. coli* O157:H7, *Enterobacter*  
253 *sp.*, *S. enterica*, *Streptococcus oralis*. *H. parainfluenzae*, was positively associated with *H.*  
254 *pittmaniae*, *N. meningitidis*, *Alloprevotella sp.* and *Tennerella sp.* A total of 13 significant  
255 negative correlations ( $P < 0.05$ ) were observed associated with *C. botulinum* ranging from -0.67-  
256 to -0.77 correlation ( $r$ ) value.

257 Correlation analysis ( $P < 0.05$ ) with probiotics and normal-flora were found to have 109 positive  
258 correlations with  $r > 0.6$ . Control group featured with a cluster of 15 normal-flora, mostly of  
259 *Leptotrichia* and *Bacteroides*, positively associated with each other. In SARS-CoV-2 diabetic

260 group, 6 of normal flora and 6 probiotics were showing significant positive associations (Figure  
261 3B).

### 262 **Probiotic's bacteriocins vs pathogen's outer membrane or toxins**

263 The structure of Salvaricin G32, KLD4 (alpha), Lactacin F, Thermophylin and Lactocin F were  
264 generated as released by the specific probiotic bacteria identified in this study (Figure 4). The  
265 structure of Enterocin produced by *Enterococcus faecium* and pathogenic proteins were available  
266 in the Research Collaboratory for Structural Bioinformatics Protein Data Bank (RCSB PDB,  
267 <http://rcsb.org>)<sup>23</sup>. All bacteriocins released by those probiotics and pathogenic proteins were  
268 showing variable strength of binding affinities (Table 1). The more negative the score the  
269 stronger the bond. The KLD4 (alpha) of *Ligilactobacillus salivarius* shows higher binding or  
270 neutralizing capacity against Outer membrane protein, Omp33 of *A. baumannii*, Shiga toxin of *E.*  
271 *coli* O157:H7, Hemolysin of the *P. intermedia*. Lactacin F of *Lactobacillus johnsonii* showed the  
272 highest binding affinity against the outer membrane protein A of *K. pneumoniae*.

273 **Discussion:**

274 SARS-CoV-2 virus infected over 83 million people including 1.8 million deaths globally in  
275 2020. The infections caused by this virus affected mostly people with old age, obesity, type 2  
276 diabetes, hypertension and cardiovascular diseases, especially among males<sup>24</sup>. Microbiome  
277 analysis of co-morbid patients is thus imperative to understanding the influence of microbiota on  
278 immune processes in SARS-CoV-2 infections<sup>25</sup>. Our study compared the baseline  
279 nasopharyngeal microbiome of SARS-CoV-2 infected diabetic and non-diabetic patients with  
280 controls adjusted with age and gender. The SARS-CoV-2 genome identified among the study  
281 enrolled patients belonged to G, GR and GH phylogenetic clades. These three clades cover more  
282 than 85% of the strains worldwide<sup>26</sup>. Our study also analyzed various alpha ( $\alpha$ ) and beta ( $\beta$ )  
283 diversity indexes to observe metagenomic variations in all samples.  $\alpha$ -diversity provides the  
284 effect of disparity in species to understand microbial communities and diversities on a host. The  
285  $\alpha$ -diversity profile for bacteria in our study indicated that the control, SARS-CoV-2 diabetic, and  
286 non-diabetic groups have a significant exponential Shannon diversity index ( $p=0.05$ ).  $\beta$ -diversity  
287 provides the index of variation in species composition among different habitats. The  $\beta$ -diversity  
288 bray matrix PERMANOVA analysis in this study indicated significant dissimilarities of all  
289 microbial communities ( $p=0.04$ ) and bacterial inhabitants ( $p=0.02$ ) in all three groups.  
290 Firmicutes, Bacteroidetes and Proteobacteria were found abundantly in all three groups.  
291 However, Fusobacteria were highly abundant in the control group and Actinobacteria were  
292 highly abundant in SARS-CoV-2 diabetic group (Figure s4). The dominance of Firmicutes in  
293 diabetic patients were also described in other studies<sup>27, 28</sup>.

294 The bacterial species in SARS-CoV-2 diabetic and non-diabetic groups were pathogens enriched  
295 compared to control (Figure 2A); however, the SARS-CoV-2 diabetic group was enriched with  
296 opportunistic pathogens compared to others (Figure 2B). In this study, the SARS-CoV-2 diabetic  
297 group consisted of 18 (82%) pathogens, 23 (77%) opportunistic pathogens, 8 (40%) normal-flora  
298 and 6 (75%) probiotics compared to the control group which consisted 12 (55%) pathogens, 14  
299 (47%) opportunistic pathogens, 19 (95%) normal-flora and no (0%) probiotic. SARS-CoV-2  
300 non-diabetic group contained 14 (64%) pathogens, 10 (33%) opportunistic pathogens, 3 (15%)  
301 normal-flora and 3 (38%) probiotics. The Kruskal-Wallis significance test of variance  
302 demonstrated that the SARS-CoV-2 diabetic patients possess a significantly increased species of  
303 pathogens ( $p<0.05$ ) and opportunistic pathogens ( $p<0.05$ ) compared to the control and SARS-

304 CoV-2 non-diabetic group. The taxonomic unit (species) of pathogenic bacteria (both pathogens  
305 and opportunistic pathogens) in this study were 41 in SARS-CoV-2 diabetic group compared to  
306 26 in the control and 24 in SARS-CoV-2 non-diabetic group (Figure 2A, 2B). A similar finding  
307 was reported in a comparative cross-sectional study by <sup>9</sup> which demonstrated that the SARS-  
308 CoV-2 infected ICU patients harbored more pathogenic bacteria and viruses. Another recent  
309 study <sup>29</sup> also reported a significantly higher abundance of opportunistic pathogens in SARS-  
310 CoV-2 infected patients, such as *Streptococcus*, *Rothia*, *Veillonella*, and *Actinomyces*; and a  
311 lower relative abundance of beneficial symbionts compared with healthy human. In our study,  
312 the controls were enriched with numerous species of normal-flora compared to both SARS-CoV-  
313 2 positive groups (Figure 2C). The control group contained 19 species of normal-flora which was  
314 reduced to 8 in SARS-CoV-2 diabetic group and only 3 in SARS-CoV-2 non-diabetic group. A  
315 group of researchers reported that the specific intestinal microbiota of COVID-19 patients <sup>30</sup>  
316 could suppress the SARS-CoV-2 attachment. The severe patients might have featured dysbiosis  
317 and the normal microbiota has been replaced with pathogenic bacteria <sup>31</sup>. Hyperglycemia,  
318 inflammation and severe oxidative stress in a patient's physique may alter the oral microbiome  
319 <sup>32</sup>. Other evidence also suggested an association of dysbiosis of the normal microbiota due to  
320 diabetes <sup>33,34</sup>. Moreover, studies on SARS viral epidemic demonstrated that co-infection was one  
321 of the major complications in prolonged hospitalization and mechanical ventilation. Pathogenic  
322 bacteria like *E. faecalis*, *K. pneumonia*, *A. baumannii*, and *Stenotrophomonas maltophilia*  
323 inhabited inside the oral cavity can also cause nosocomial infections <sup>35</sup>. Several studies found  
324 that opportunistic pathogens were the most common cause of secondary infections in viral  
325 epidemic <sup>36,37</sup>. Pathogenic bacteria like *Legionella pneumophila* <sup>38</sup>, *N. meningitidis*, *Moraxella*  
326 *catarrhalis* <sup>39</sup> were known to be associated with influenza co-infection. *Porphyromonas*  
327 *gingivalis*, also found in our study, was an important cause of periodontitis <sup>40</sup>. The use of  
328 antibiotic to prevent secondary infections may also lead to the loss of normal-flora and probiotics  
329 causing dysbiosis in patients with COVID-19.

330 One interesting finding in our study was the absence of *H. pneumoniae*, *N. meningitidis*, *S.*  
331 *parasanguinis* and *H. pittmaniae* in the SARS-CoV-2 diabetic groups, unlike other pathogenic  
332 bacteria (Figure 2A). However, those bacteria significantly enriched the control groups in our  
333 study which was also evident by Qin et al <sup>34</sup> and his research team. Another interesting feature in  
334 our study was the significant reduction of normal-flora in both SARS-CoV-2 patient groups such

335 as *Leptotrichia*, *Bacteroides*, *Fusobacterium*, *Chorynebacterium* and *Bernesiella* spp., indicating  
336 the imbalance of microbiota (Figure 2D-2F). Moore et al<sup>41</sup> also found a significant reduction of  
337 *Fusobacterium periodonticum* in the nasopharynx during SARS-CoV-2 infections. Those  
338 bacterial flora found in the oral cavity may inhibit pathogenic bacteria by producing  
339 antimicrobial substances such as bacteriocins, lactic acid and hydrogen peroxide which might  
340 create a hostile condition for the pathogenic bacteria<sup>30</sup>. The presence of probiotic species with  
341 several pathogens and opportunistic pathogens in the SARS-CoV-2 diabetic group revealed that  
342 those probiotics might assist the host by inhibiting those pathogenic bacteria. Our docking  
343 analysis provided an evidence of this hypothesis. The binding affinities indicate the bacteriocins  
344 from these probiotic bacteria had a strong binding affinity with the pathogenic toxins or outer  
345 membrane proteins suggesting that they have the capacity to inhibit the pathogens (Table 1).

346 The correlation coefficient network analysis in this study found significant positive associations  
347 (N=183) and few negative associations (N=13) among the pathogenic bacteria in SARS-CoV-2  
348 infected diabetic patients. The notable associations were observed in SARS-CoV-2 diabetic  
349 group with 32 species of pathogenic bacteria (both pathogens and opportunistic pathogens)  
350 compared to 11 species in SARS-CoV-2 non-diabetic and 8 species in control group (Figure 3A).  
351 This analysis indicated various patterns of pathogenic networks in the SARS-CoV-2 diabetic  
352 group especially among enteric pathogens, nosocomial bacteria and other opportunistic  
353 pathogens. However, this analysis found no correlation in the most abundant species between the  
354 control group and SARS-CoV-2 positive non-diabetic patients.

355 The co-occurrences of network among the probiotic and normal-flora identified several  
356 significant positive associations (N= 109) but no synergistic correlations. There was a separate  
357 cluster of 15 normal-flora in the control group with 90 significant positive associations which  
358 were absent in SARS-CoV-2 positive diabetic and non-diabetic groups (Figure 3B). The  
359 decrease of normal-flora in the later groups indicated that they were outnumbered by the  
360 pathogenic species mentioned above. The increase of pathogenic environment results in a non-  
361 productive busy immune response in the host which ultimately suppresses the adaptive immune  
362 response against SARS-CoV-2. Nevertheless, increased species of probiotic strains (N=6) in the  
363 SARS-CoV-2 diabetic group compared to the control group (N=0) and SARS-CoV-2 non-  
364 diabetic group (N=3) indicated an inadequate resistance against highly abundant pathogenic

365 bacteria. Another study<sup>42</sup> demonstrated that immunomodulatory probiotics, *Rothia*  
366 *mucilaginosa*, *K. oxytoca*, *Enterobacter kobei*, *Bacillus cereus*, *Faecalibacterium prausnitzii* etc.  
367 were enriched at COVID-19 positive patients. Our study had a limitation that the microbiome  
368 analyses was performed with small number of individuals studied. In developing countries, this  
369 limitation is quite common because of paradoxical situations; doubled price of metagenome  
370 reagents in developing countries, extended delivery time with short period of expiry, and  
371 unavailability of reagents during the peak times of COVID-19 infections. Therefore, there are  
372 very few data reported from those regions where the highest number of patients are having  
373 comorbidity. However, our preliminary observations and hypothesis were supported by  
374 appropriate statistical methods and the results are compared with suitable controls.

375

## 376 **Conclusions**

377 The SARS-CoV-2 positive diabetic patients were possessed by significantly increased  
378 pathogenic species compared to the control and SARS-CoV-2 non-diabetic group. In both  
379 groups, the normal-flora strains were replaced by numerous pathogenic bacterial species which  
380 might correlate the severity and outcome of complications. Patients within the SARS-CoV-2  
381 positive non-diabetic group exhibited significantly increased opportunistic pathogens compared  
382 to the control. Those dysbiosis suppressed the adaptive immune response against SARS-CoV-2  
383 because of induced immune response against those pathogenic bacteria. Presence of few  
384 probiotic species among the SARS-CoV-2 diabetic patients indicated that those probiotics were  
385 inhibiting the pathogens as observed in our study. However, the numbers might not be  
386 competitive enough to provide successful protection as seen within deceased patients. One  
387 approach for maintaining a healthy microbiome in SARS-CoV-2 diabetic patients might include  
388 promoting probiotics and normal-flora by dietary changes and reducing pro-inflammatory states.  
389 Relocation of the microbial balance with normal-flora and sufficient probiotics may prevent  
390 pathogenic environments and excessive inflammations that might enhance the adaptive immune  
391 response, leading to better outcomes for the SARS-CoV-2 diabetic patients.

392

393

394 **Funding:** The study was funded by Jashore University of Science and Technology, Jashore-  
395 7408, Bangladesh.

396 Table 1: Binding affinity energy of Bacteriocins from probiotic bacteria with toxins or outer  
 397 membrane protein of pathogens.

| Bacteriocins                                        | Outer membrane Protein A<br><i>Klebsiella pneumoniae</i> | Outer membrane protein Omp33<br><i>Acinetobacter baumannii</i> | Shiga toxin<br><i>E. coli</i><br>O157:H7 | Hemolysin<br><i>Prevotella intermedia</i> |
|-----------------------------------------------------|----------------------------------------------------------|----------------------------------------------------------------|------------------------------------------|-------------------------------------------|
| Salivaricin G32:<br><i>Streptococcus salivarius</i> | -10.4                                                    | -12.9                                                          | -9.8                                     | -9.6                                      |
| KLD4(alpha):<br><i>Ligilactobacillus salivarius</i> | -6.5                                                     | -14.7                                                          | -14.4                                    | -10.1                                     |
| LactacinF:<br><i>Lactobacillus johnsonii</i>        | -12.1                                                    | -11.1                                                          | -8.4                                     | -8.1                                      |
| Thermophylin:<br><i>Streptococcus thermophilus</i>  | -9.2                                                     | -12.9                                                          | -9.7                                     | -6.5                                      |
| Lactocin 705:<br><i>Latilactobacillus</i>           | -8.5                                                     | -12.8                                                          | -10.2                                    | -8.2                                      |
| Enterocin:<br><i>Enterococcus faecium</i>           | -9.7                                                     | -13.0                                                          | -10.9                                    | -9.3                                      |

398



399   References

- 400   1.     WHO. COVID-19 Weekly Epidemiological Update-29 December 2020. (2020).  
401
- 402   2.     Yang X, *et al.* Clinical course and outcomes of critically ill patients with SARS-CoV-2 pneumonia  
403       in Wuhan, China: a single-centered, retrospective, observational study. *The Lancet Respiratory*  
404       *Medicine* **8**, 475-481 (2020).
- 405
- 406   3.     Grasselli G, *et al.* Risk factors associated with mortality among patients with COVID-19 in  
407       intensive care units in Lombardy, Italy. *JAMA internal medicine* **180**, 1345-1355 (2020).
- 408
- 409   4.     Zhu L, *et al.* Association of blood glucose control and outcomes in patients with COVID-19 and  
410       pre-existing type 2 diabetes. *Cell metabolism*, (2020).
- 411
- 412   5.     Jain V, Yuan J-M. Predictive symptoms and comorbidities for severe COVID-19 and intensive care  
413       unit admission: a systematic review and meta-analysis. *International Journal of Public Health*, 1  
414       (2020).
- 415
- 416   6.     Unwin N, Whiting D, Guariguata L, Ghyoot G, Gan D, IDF DA. International Diabetes Federation.  
417       *IDF Diabetes Atlas*, 22-37 (2009).
- 418
- 419   7.     Elbe S, Buckland-Merrett G. Data, disease and diplomacy: GISAID's innovative contribution to  
420       global health. *Global Challenges* **1**, 33-46 (2017).
- 421
- 422   8.     Bao L, Zhang C, Dong J, Zhao L, Li Y, Sun J. Oral microbiome and SARS-CoV-2: Beware of lung co-  
423       infection. *Frontiers in Microbiology* **11**, 1840 (2020).
- 424
- 425   9.     Rodriguez C, *et al.* Genomic, Metagenomic and Transcriptomic Characterization of the Clinical  
426       Forms of COVID-19: A Comparative Cross-Sectional Study. (2020).
- 427
- 428   10.    Zhou F, *et al.* Clinical course and risk factors for mortality of adult inpatients with COVID-19 in  
429       Wuhan, China: a retrospective cohort study. *The lancet*, (2020).
- 430
- 431   11.    De Maio F, Posteraro B, Ponziani FR, Cattani P, Gasbarrini A, Sanguinetti M. Nasopharyngeal  
432       Microbiota Profiling of SARS-CoV-2 Infected Patients. (2020).
- 433
- 434   12.    Lu B, *et al.* Integrated characterization of SARS-CoV-2 genome, microbiome, antibiotic resistance  
435       and host response from single throat swabs. *bioRxiv*, (2020).

436

- 437 13. Grant JR, Stothard P. The CGView Server: a comparative genomics tool for circular genomes.  
438 *Nucleic acids research* **36**, W181-W184 (2008).
- 439  
440 14. Richter M, Rosselló-Móra R. Shifting the genomic gold standard for the prokaryotic species  
441 definition. *Proceedings of the National Academy of Sciences* **106**, 19126-19131 (2009).
- 442  
443 15. Li H, *et al.* The sequence alignment/map format and SAMtools. *Bioinformatics* **25**, 2078-2079  
444 (2009).
- 445  
446 16. Bushnell B. BBMap: a fast, accurate, splice-aware aligner. Lawrence Berkeley National  
447 Lab.(LBNL), Berkeley, CA (United States) (2014).
- 448  
449 17. Stewart RD, *et al.* Assembly of 913 microbial genomes from metagenomic sequencing of the  
450 cow rumen. *Nature communications* **9**, 1-11 (2018).
- 451  
452 18. Li H, Durbin R. Fast and accurate short read alignment with Burrows–Wheeler transform.  
453 *bioinformatics* **25**, 1754-1760 (2009).
- 454  
455 19. Wood DE, Lu J, Langmead B. Improved metagenomic analysis with Kraken 2. *Genome biology* **20**,  
456 257 (2019).
- 457  
458 20. Gérikas Ribeiro C, Marie D, Lopes dos Santos A, Pereira Brandini F, Vaulot D. Estimating  
459 microbial populations by flow cytometry: Comparison between instruments. *Limnology and*  
460 *Oceanography: Methods* **14**, 750-758 (2016).
- 461  
462 21. Conteville LC, Oliveira-Ferreira J, Vicente ACP. Gut microbiome biomarkers and functional  
463 diversity within an amazonian semi-nomadic hunter-gatherer group. *Frontiers in microbiology*  
464 **10**, 1743 (2019).
- 465  
466 22. Love MI, Huber W, Anders S. Moderated estimation of fold change and dispersion for RNA-seq  
467 data with DESeq2. *Genome biology* **15**, 1-21 (2014).
- 468  
469 23. Rose PW, *et al.* The RCSB protein data bank: integrative view of protein, gene and 3D structural  
470 information. *Nucleic acids research*, gkw1000 (2016).
- 471  
472 24. Petrilli CM, *et al.* Factors associated with hospital admission and critical illness among 5279  
473 people with coronavirus disease 2019 in New York City: prospective cohort study. *bmj* **369**,  
474 (2020).
- 475  
476 25. Friedland RP, Haribabu B. The role for the metagenome in the pathogenesis of COVID-19.  
477 *EBioMedicine* **61**, (2020).

- 478  
479 26. Islam OK, Al-Emran HM, Hasan MS, Anwar A, Jahid MIK, Hossain MA. Emergence of European  
480 and North American mutant variants of SARS-CoV-2 in South-East Asia. *Transboundary and*  
481 *emerging diseases*, (2020).
- 482  
483 27. Lambeth SM, *et al.* Composition, diversity and abundance of gut microbiome in prediabetes and  
484 type 2 diabetes. *Journal of diabetes and obesity* **2**, 1 (2015).
- 485  
486 28. Nuli R, Azhati J, Cai J, Kadeer A, Zhang B, Mohemaiti P. Metagenomics and Faecal Metabolomics  
487 Integrative Analysis towards the Impaired Glucose Regulation and Type 2 Diabetes in Uyghur-  
488 Related Omics. *Journal of diabetes research* **2019**, (2019).
- 489  
490 29. Silan G, Chen Y, Wu Z. Alterations of the gut microbiota in patients with coronavirus disease  
491 2019 or H1N1 influenza. *Clin Infect Dis; ciaa709*, (2020).
- 492  
493 30. Zuo T, *et al.* Depicting SARS-CoV-2 faecal viral activity in association with gut microbiota  
494 composition in patients with COVID-19. *Gut* **70**, 276-284 (2020).
- 495  
496 31. Saeb AT, *et al.* Relative reduction of biological and phylogenetic diversity of the oral microbiota  
497 of diabetes and pre-diabetes patients. *Microbial pathogenesis* **128**, 215-229 (2019).
- 498  
499 32. Xiao E, *et al.* Diabetes enhances IL-17 expression and alters the oral microbiome to increase its  
500 pathogenicity. *Cell host & microbe* **22**, 120-128. e124 (2017).
- 501  
502 33. Cani PD. Human gut microbiome: hopes, threats and promises. *Gut* **67**, 1716-1725 (2018).
- 503  
504 34. Qin J, *et al.* A metagenome-wide association study of gut microbiota in type 2 diabetes. *Nature*  
505 **490**, 55-60 (2012).
- 506  
507 35. Li L, Shi Y, Liu H. Organism distribution and drug resistance analysis in 13 cases of SARS patients  
508 with secondary infection. *Chin J Infect Control* **4**, 252-254 (2005).
- 509  
510 36. Yu L, *et al.* Immunodepletion with hypoxemia: a potential high risk subtype of coronavirus  
511 disease 2019. *MedRxiv*, (2020).
- 512  
513 37. MacIntyre CR, *et al.* The role of pneumonia and secondary bacterial infection in fatal and serious  
514 outcomes of pandemic influenza a (H1N1) pdm09. *BMC infectious diseases* **18**, 1-20 (2018).
- 515  
516 38. Rizzo C, Caporali MG, Rota MC. Pandemic influenza and pneumonia due to Legionella  
517 pneumophila: a frequently underestimated coinfection. *Clinical infectious diseases* **51**, 115-115  
518 (2010).

- 519  
520 39. Cruz CSD, Wunderink RG. Respiratory viral and atypical pneumonias. *Clinics in chest medicine* **38**,  
521 xiii-xiv (2017).
- 522  
523 40. Kuroda M, *et al.* Characterization of quasispecies of pandemic 2009 influenza A virus  
524 (A/H1N1/2009) by de novo sequencing using a next-generation DNA sequencer. *PloS one* **5**,  
525 e10256 (2010).
- 526  
527 41. Moore G, *et al.* Detection of SARS-CoV-2 within the healthcare environment: a multicentre study  
528 conducted during the first wave of the COVID-19 outbreak in England. *Journal of Hospital*  
529 *Infection*, (2020).
- 530  
531 42. Han Y, Jia Z, Shi J, Wang W, He K. The active lung microbiota landscape of COVID-19 patients.  
532 *medRxiv*, (2020).

533  
534  
535  
536 Figure 1: Bacterial  $\alpha$ -diversity-based association analysis by (A) Shannon diversity index, (B)  
537 Simpson diversity index, (C) observed, and (D) Chao. (E) Principal coordinate analysis by Bray-  
538 Curtis dissimilarity index among healthy, recovered and deceased patients.

539 Figure 2: Comparison of bacterial species with relative abundance among the groups of cases.  
540 (A) Presence of known pathogenic species with the relative intensity of bacterial genome. (B)  
541 Presence of opportunistic pathogen among different groups with relative abundances. (C) The  
542 relative abundance of normal-flora and known probiotic species (red highlights). (D) The  
543 significant difference of bacterial species and phyla by DESeq2 analysis with  $\log_2$ fold changes  
544 between control and SARS-CoV-2 diabetic group ( $p < 0.05$ ) (E) The significant difference of  
545 bacterial species by DESeq2 analysis with  $\log_2$ fold changes between control and SARS-CoV-2  
546 non-diabetic group ( $p < 0.05$ ) (F) The significant difference of bacterial species by DESeq2  
547 analysis with  $\log_2$ fold changes between SARS-CoV-2 diabetic group and SARS-CoV-2 non-  
548 diabetic group ( $p < 0.05$ ).

549 Figure 3: (A) The network analysis showing the co-occurrence patterns of pathogen  
550 opportunistic pathogen. Positive spearman correlation represents ( $r > 0.6$ ) with significant ( $P <$   
551  $0.05$ ) correlation and negative Spearman correlation ( $r$ ) range  $-0.67$ - from  $-0.77$ with significant

552 (P < 0.05) correlation. The node size is proportional to the mean abundance of the species.  
 553 (B)The network analysis showing the co-occurrence patterns of probiotics and normal-flora.  
 554 Positive spearman correlation represents (r > 0.6) with significant (P < 0.05) correlation and no  
 555 negative correlation was found here. The node size is proportional to the mean abundance of the  
 556 species.

557 Table 1: Binding affinity energy of Bacteriocins from probiotic bacteria with toxins or outer  
 558 membrane protein of pathogens.

| Bacteriocin                                       | Outer membrane Protein A<br><i>Klebsiella pneumoniae</i> | Outer membrane protein Omp33<br><i>Acinetobacter baumannii</i> | Shiga toxin<br><i>E.coli</i> O157:H7 | Hemolysin<br><i>Prevotella intermedia</i> |
|---------------------------------------------------|----------------------------------------------------------|----------------------------------------------------------------|--------------------------------------|-------------------------------------------|
| Salivaricin G32_ <i>Streptococcus salivarius</i>  | -10.4                                                    | -12.9                                                          | -9.8                                 | -9.6                                      |
| KLD4 (alpha)_ <i>Ligilactobacillus salivarius</i> | -6.5                                                     | -14.7                                                          | -14.4                                | -10.1                                     |
| LactacinF_ <i>Lactobacillus johnsonii</i>         | -12.1                                                    | -11.1                                                          | -8.4                                 | -8.1                                      |
| Thermophylin <i>Streptococcus thermophilus</i>    | -9.2                                                     | -12.9                                                          | -9.7                                 | -6.5                                      |
| Lactocin 705_ bacteriocin [Lactilactobacillus]    | -8.5                                                     | -12.8                                                          | -10.2                                | -8.2                                      |
| Enterocin _ <i>Enterococcus faecium</i>           | -9.7                                                     | -13.0                                                          | -10.9                                | -9.3                                      |

559

560 Figure 4: Putative three-dimensional structure of Salvaricin G32, KLD4 (alpha), Lactacin F,  
 561 Thermophylin and Lactocin F produced by specified probiotic bacteria. The structures were  
 562 generated using I-TASSER.

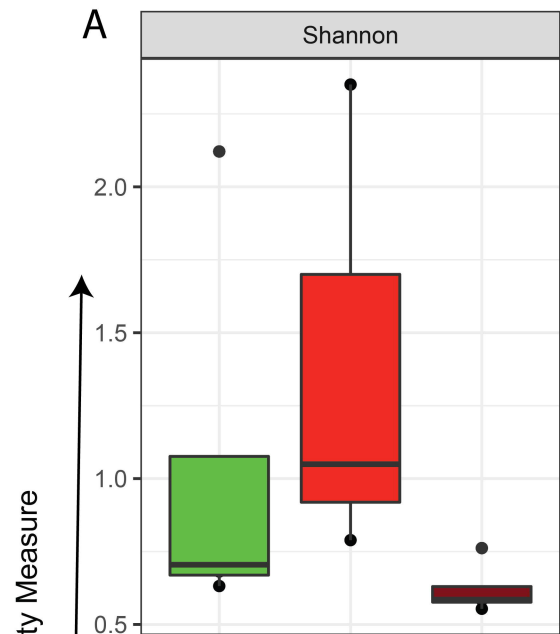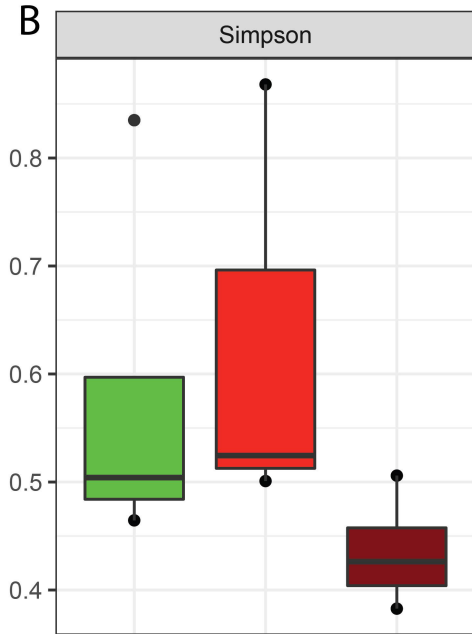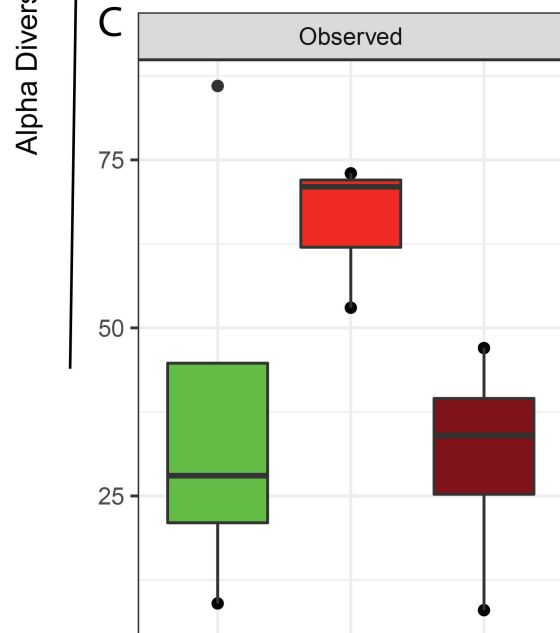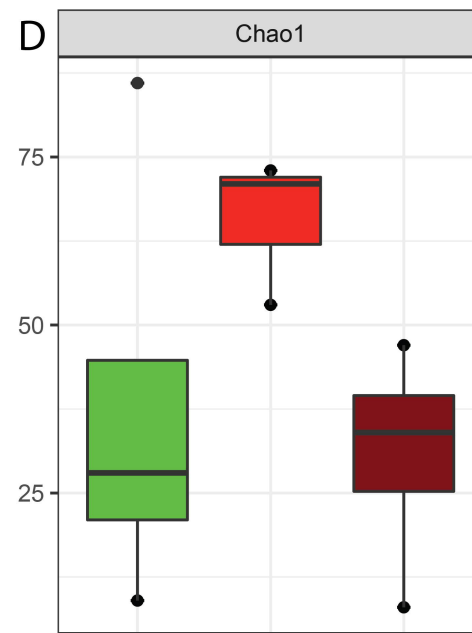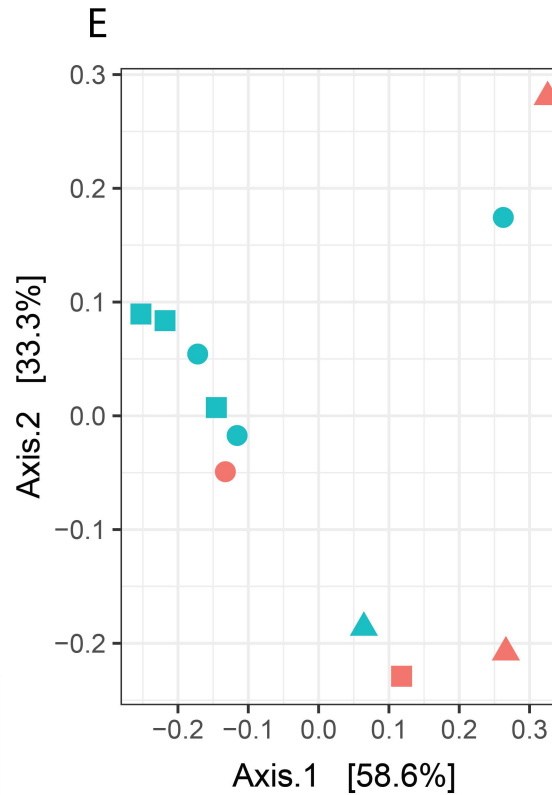

**Groups**

- Control
- ▲ SARS-CoV-2 diabetic
- SARS-CoV-2 non-diabetic

**Outcome**

- Deceased
- Recovered

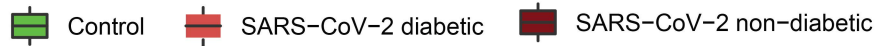

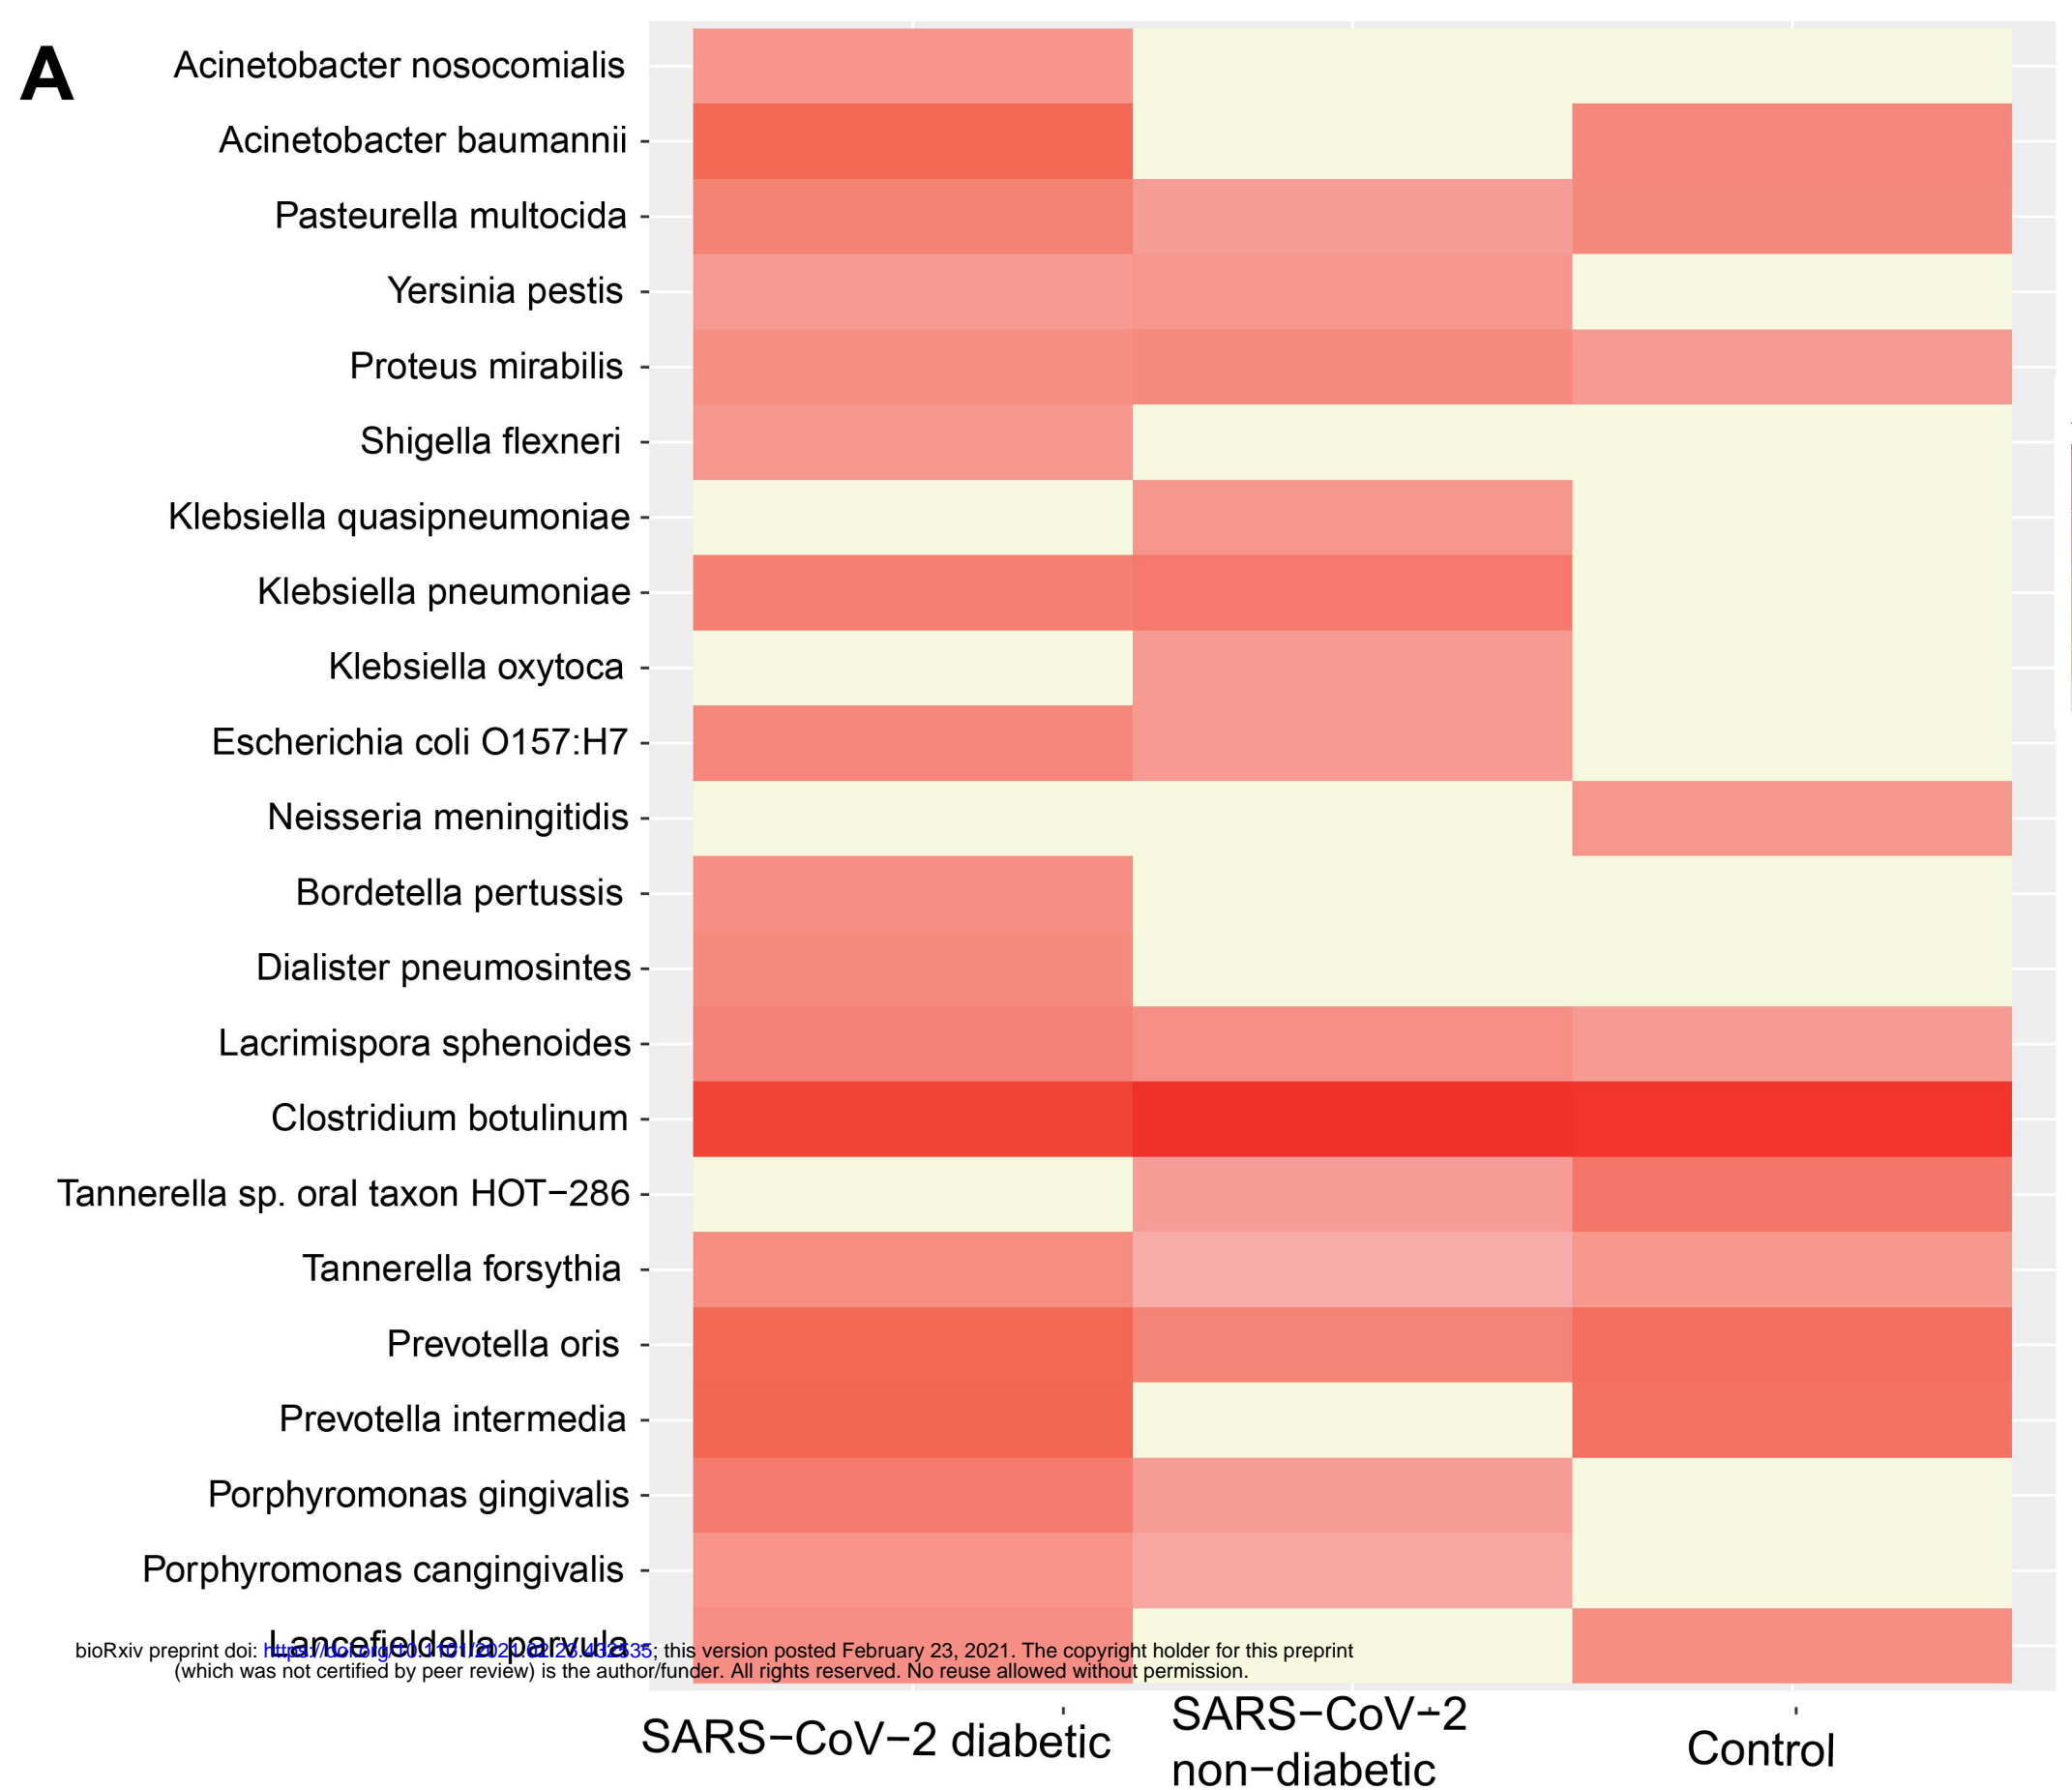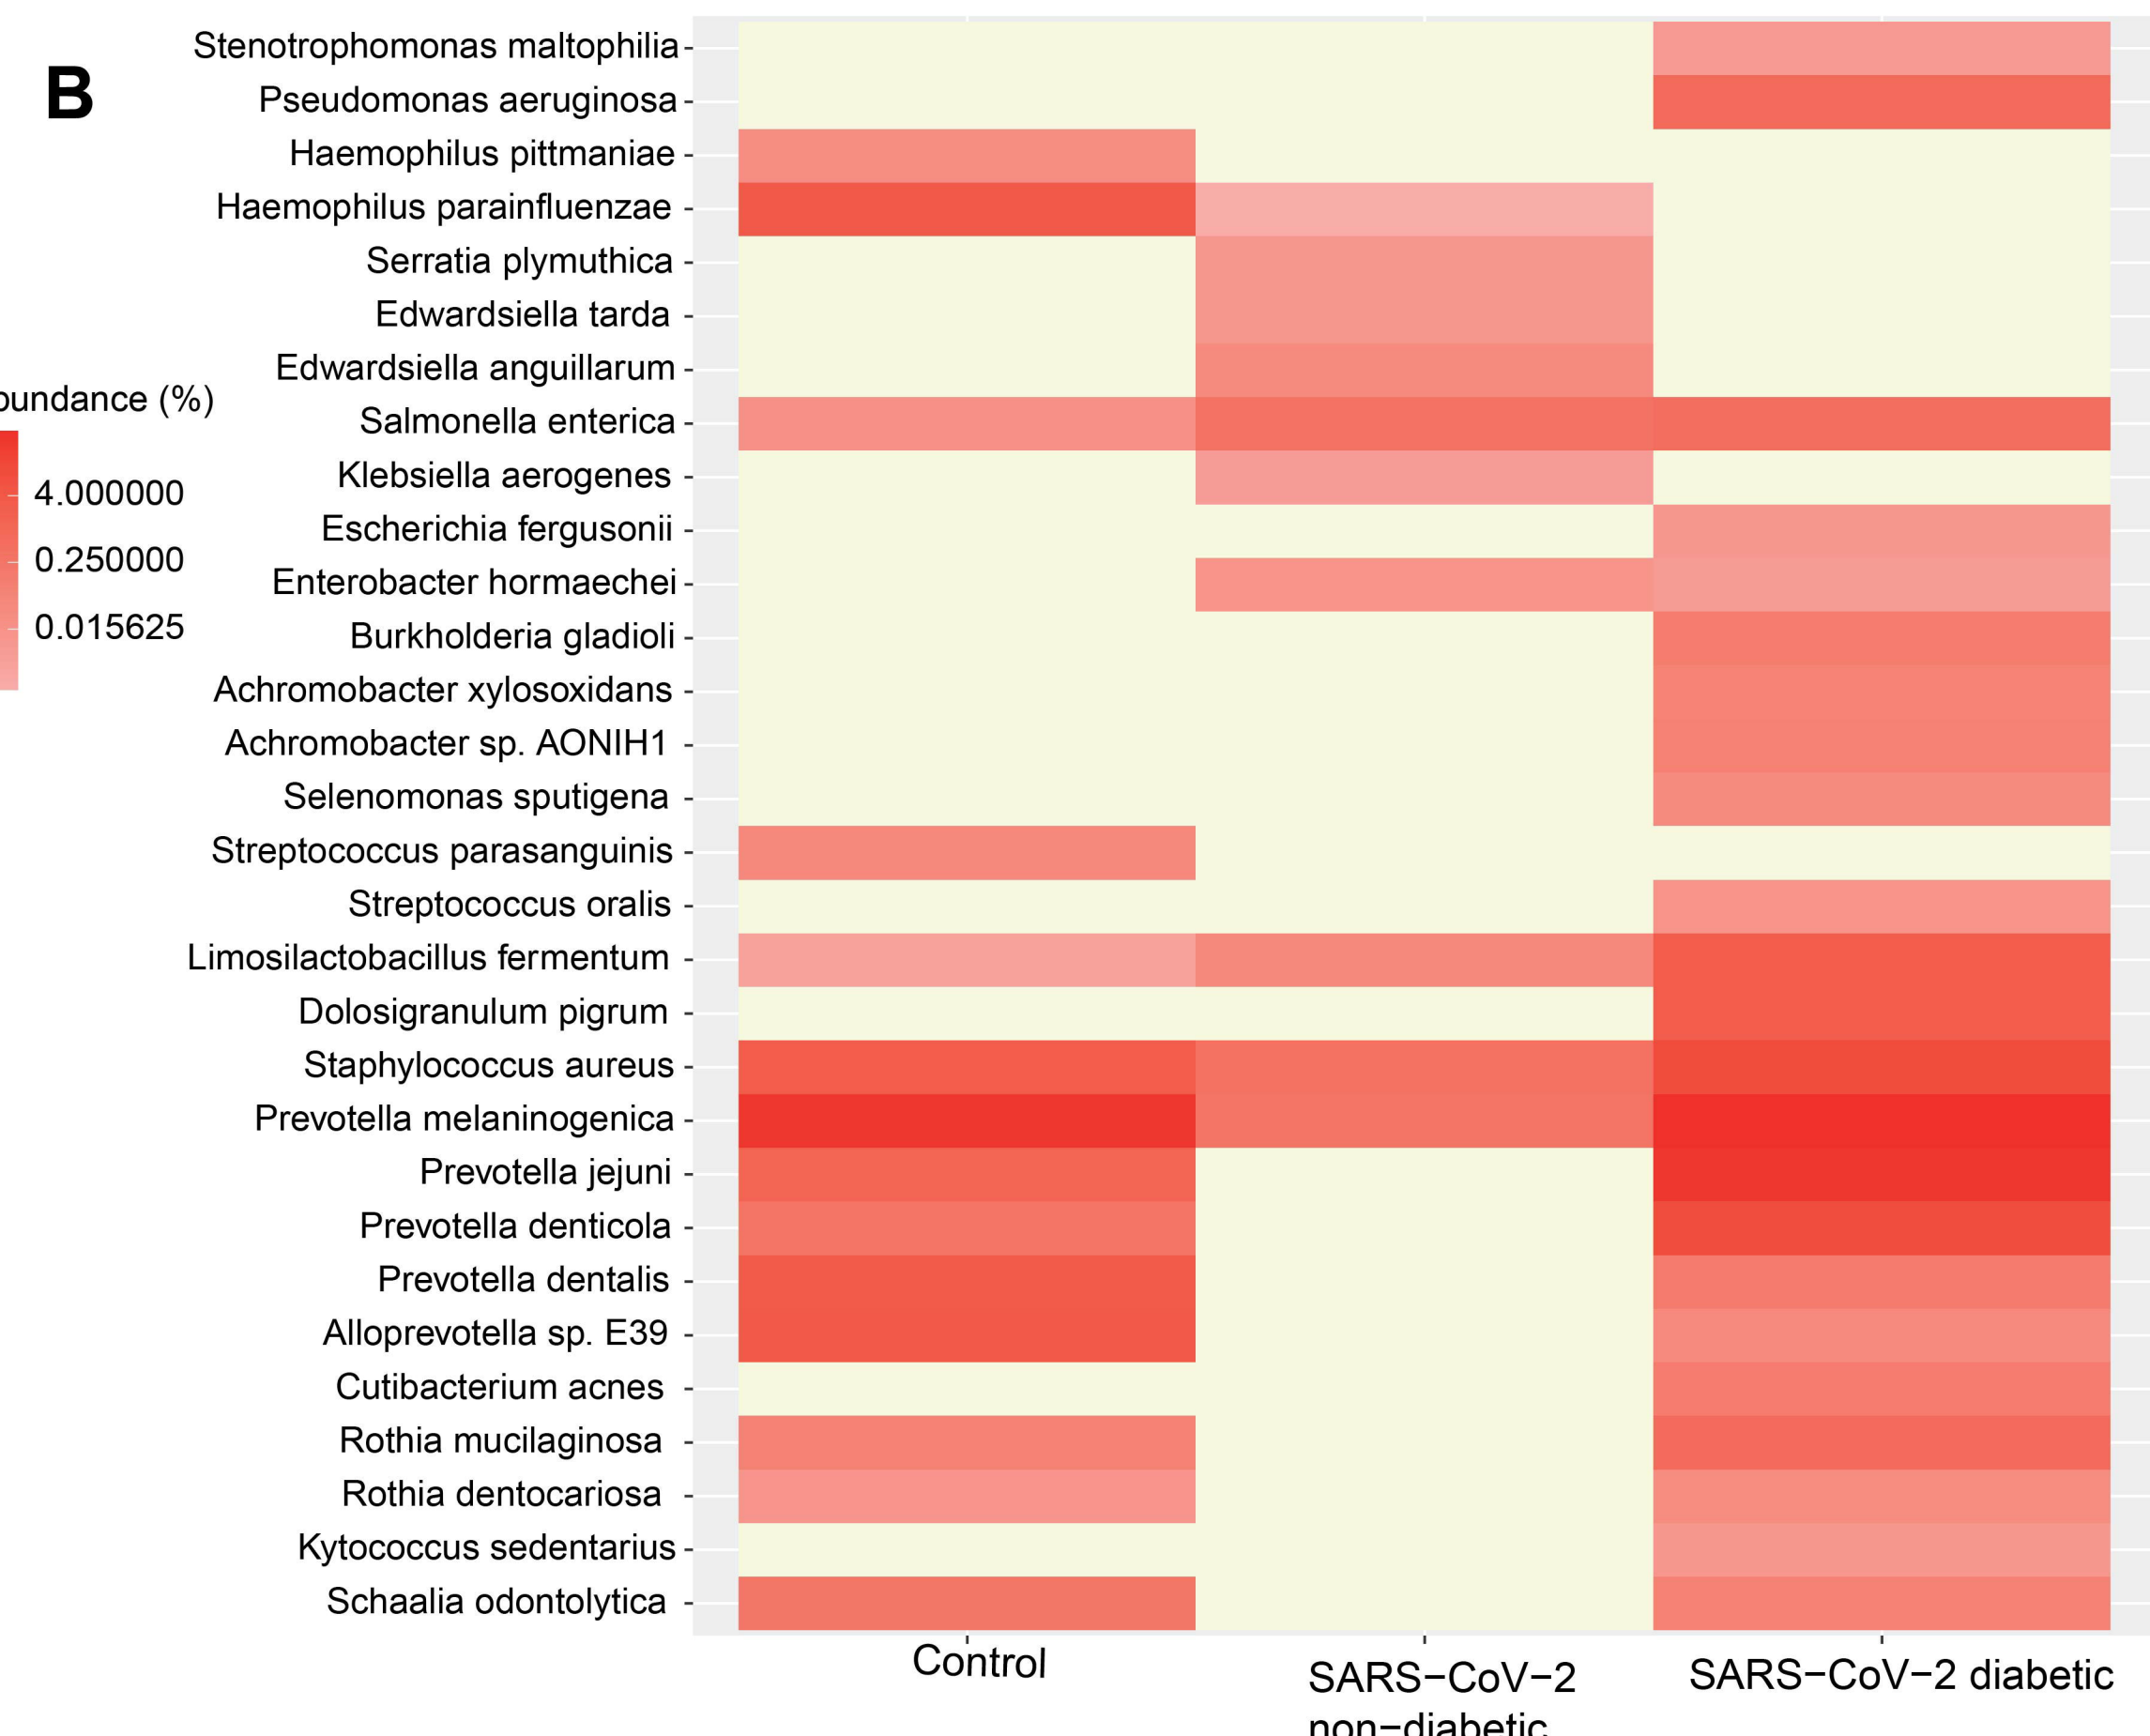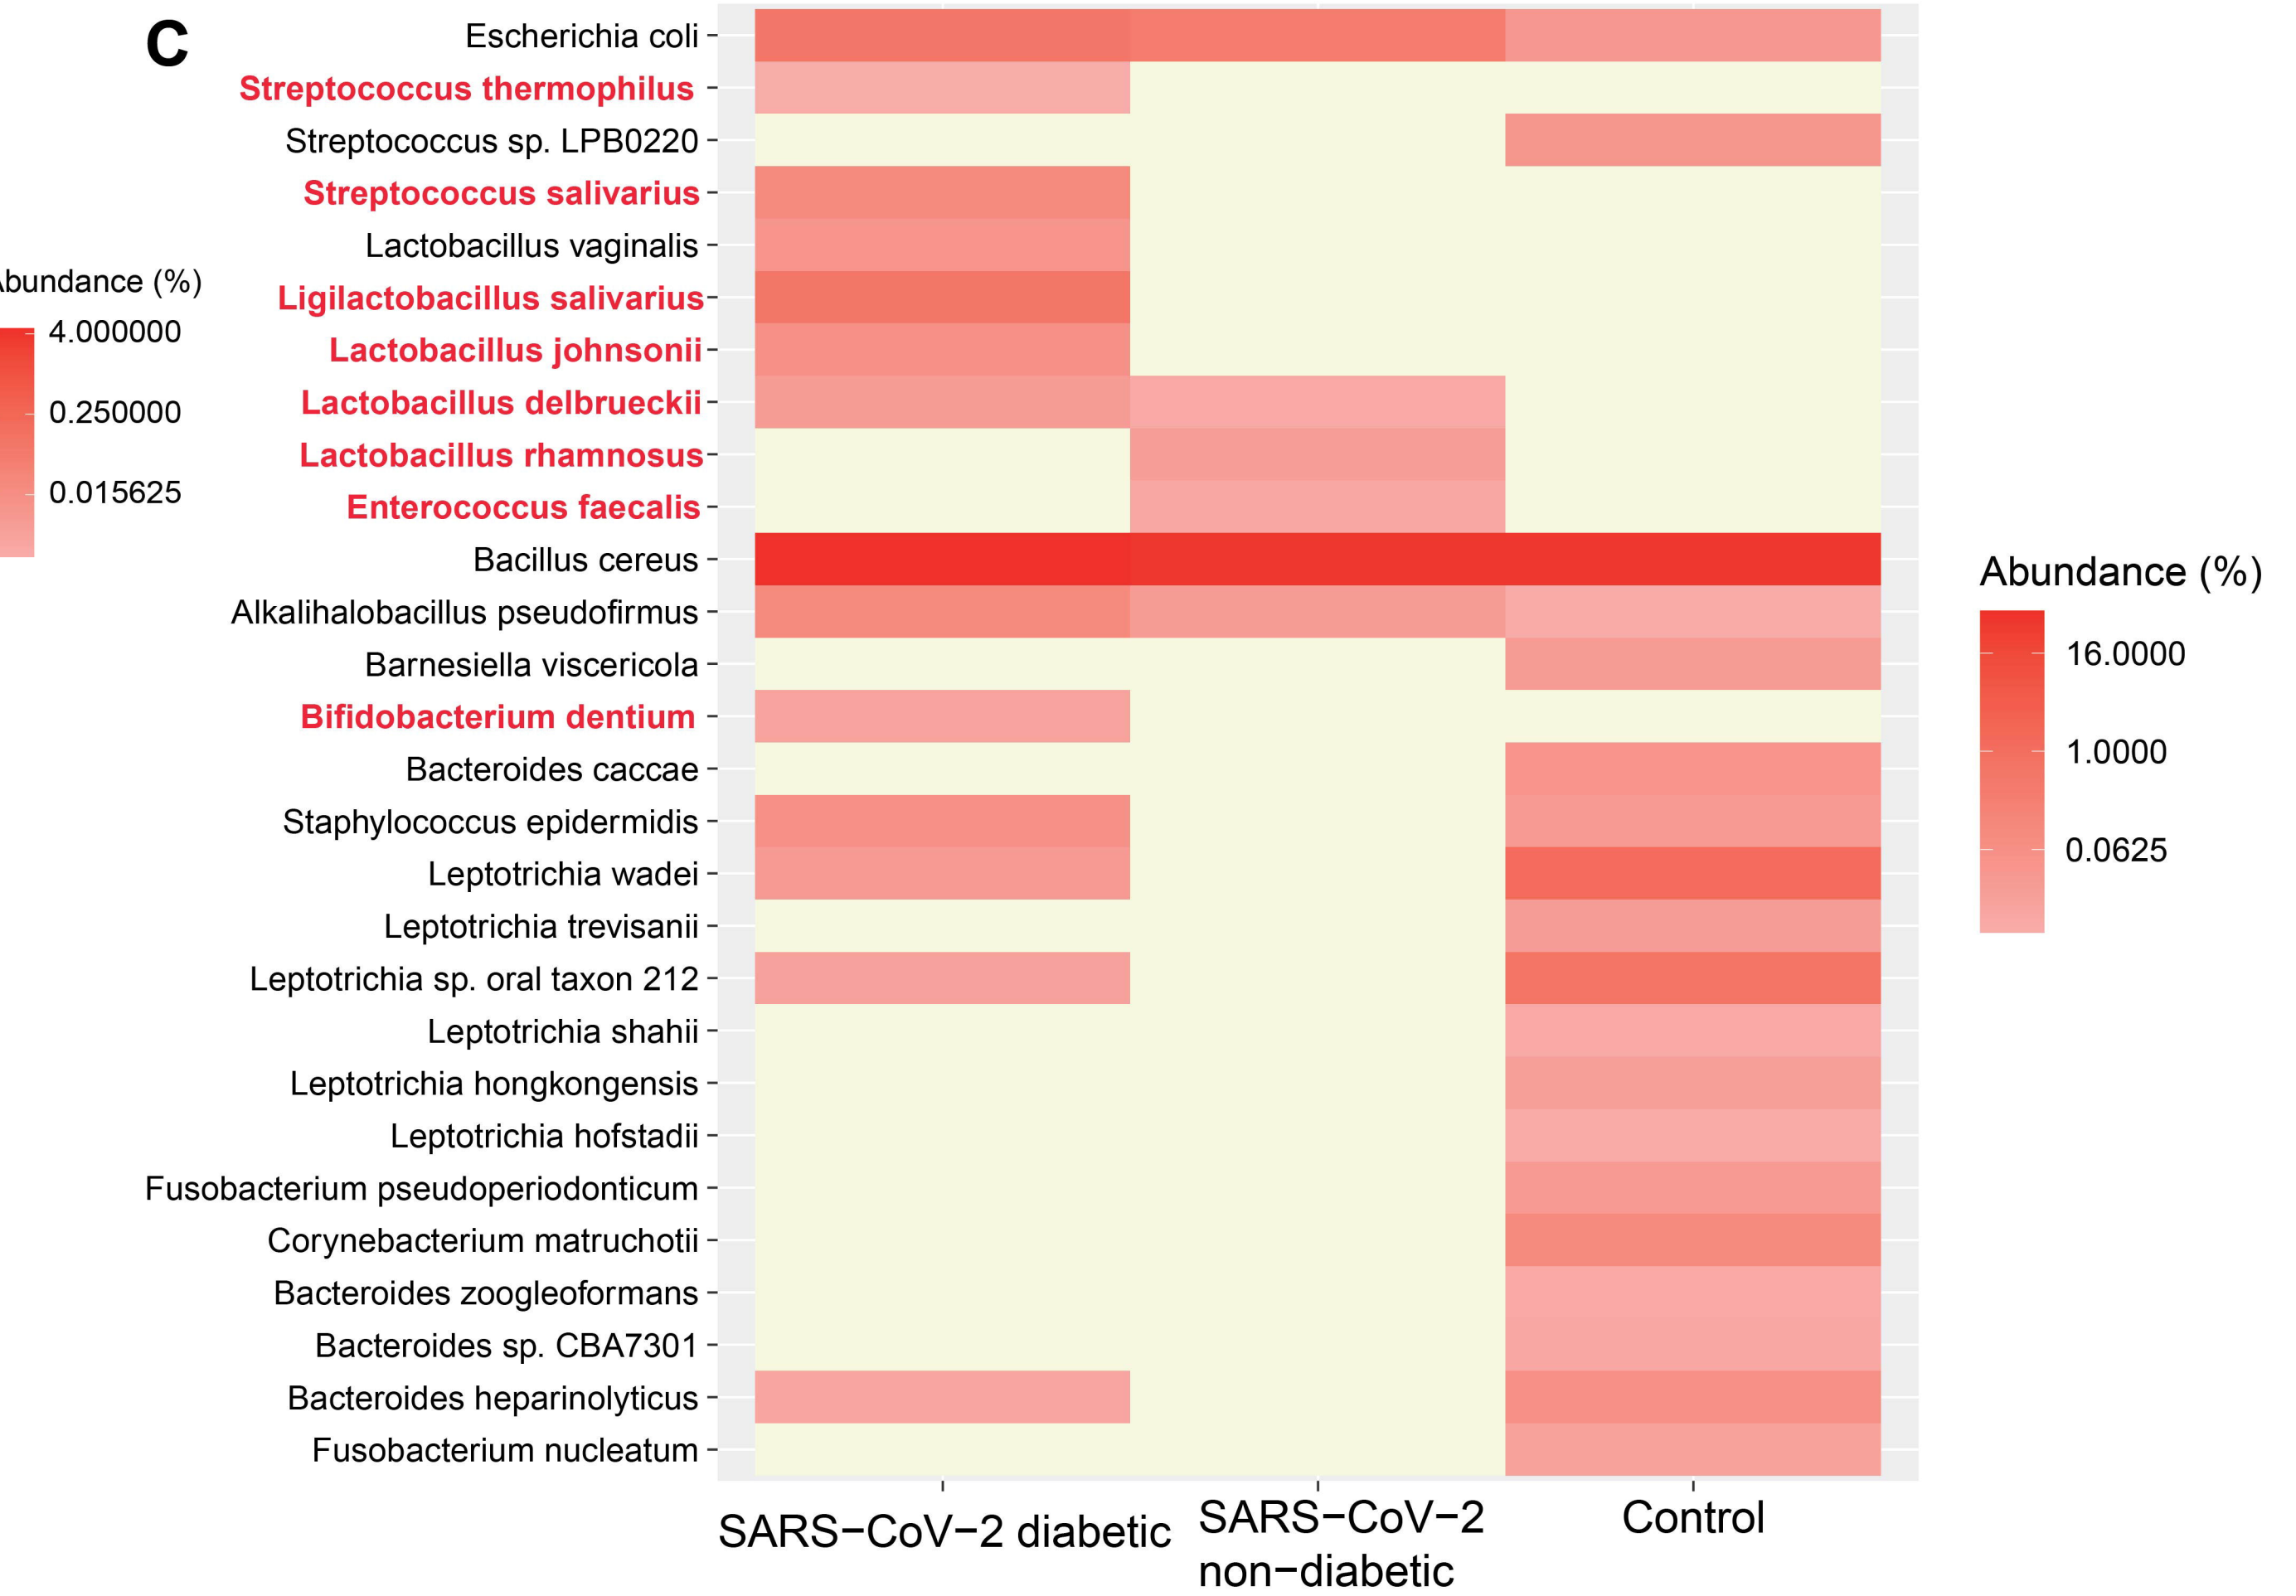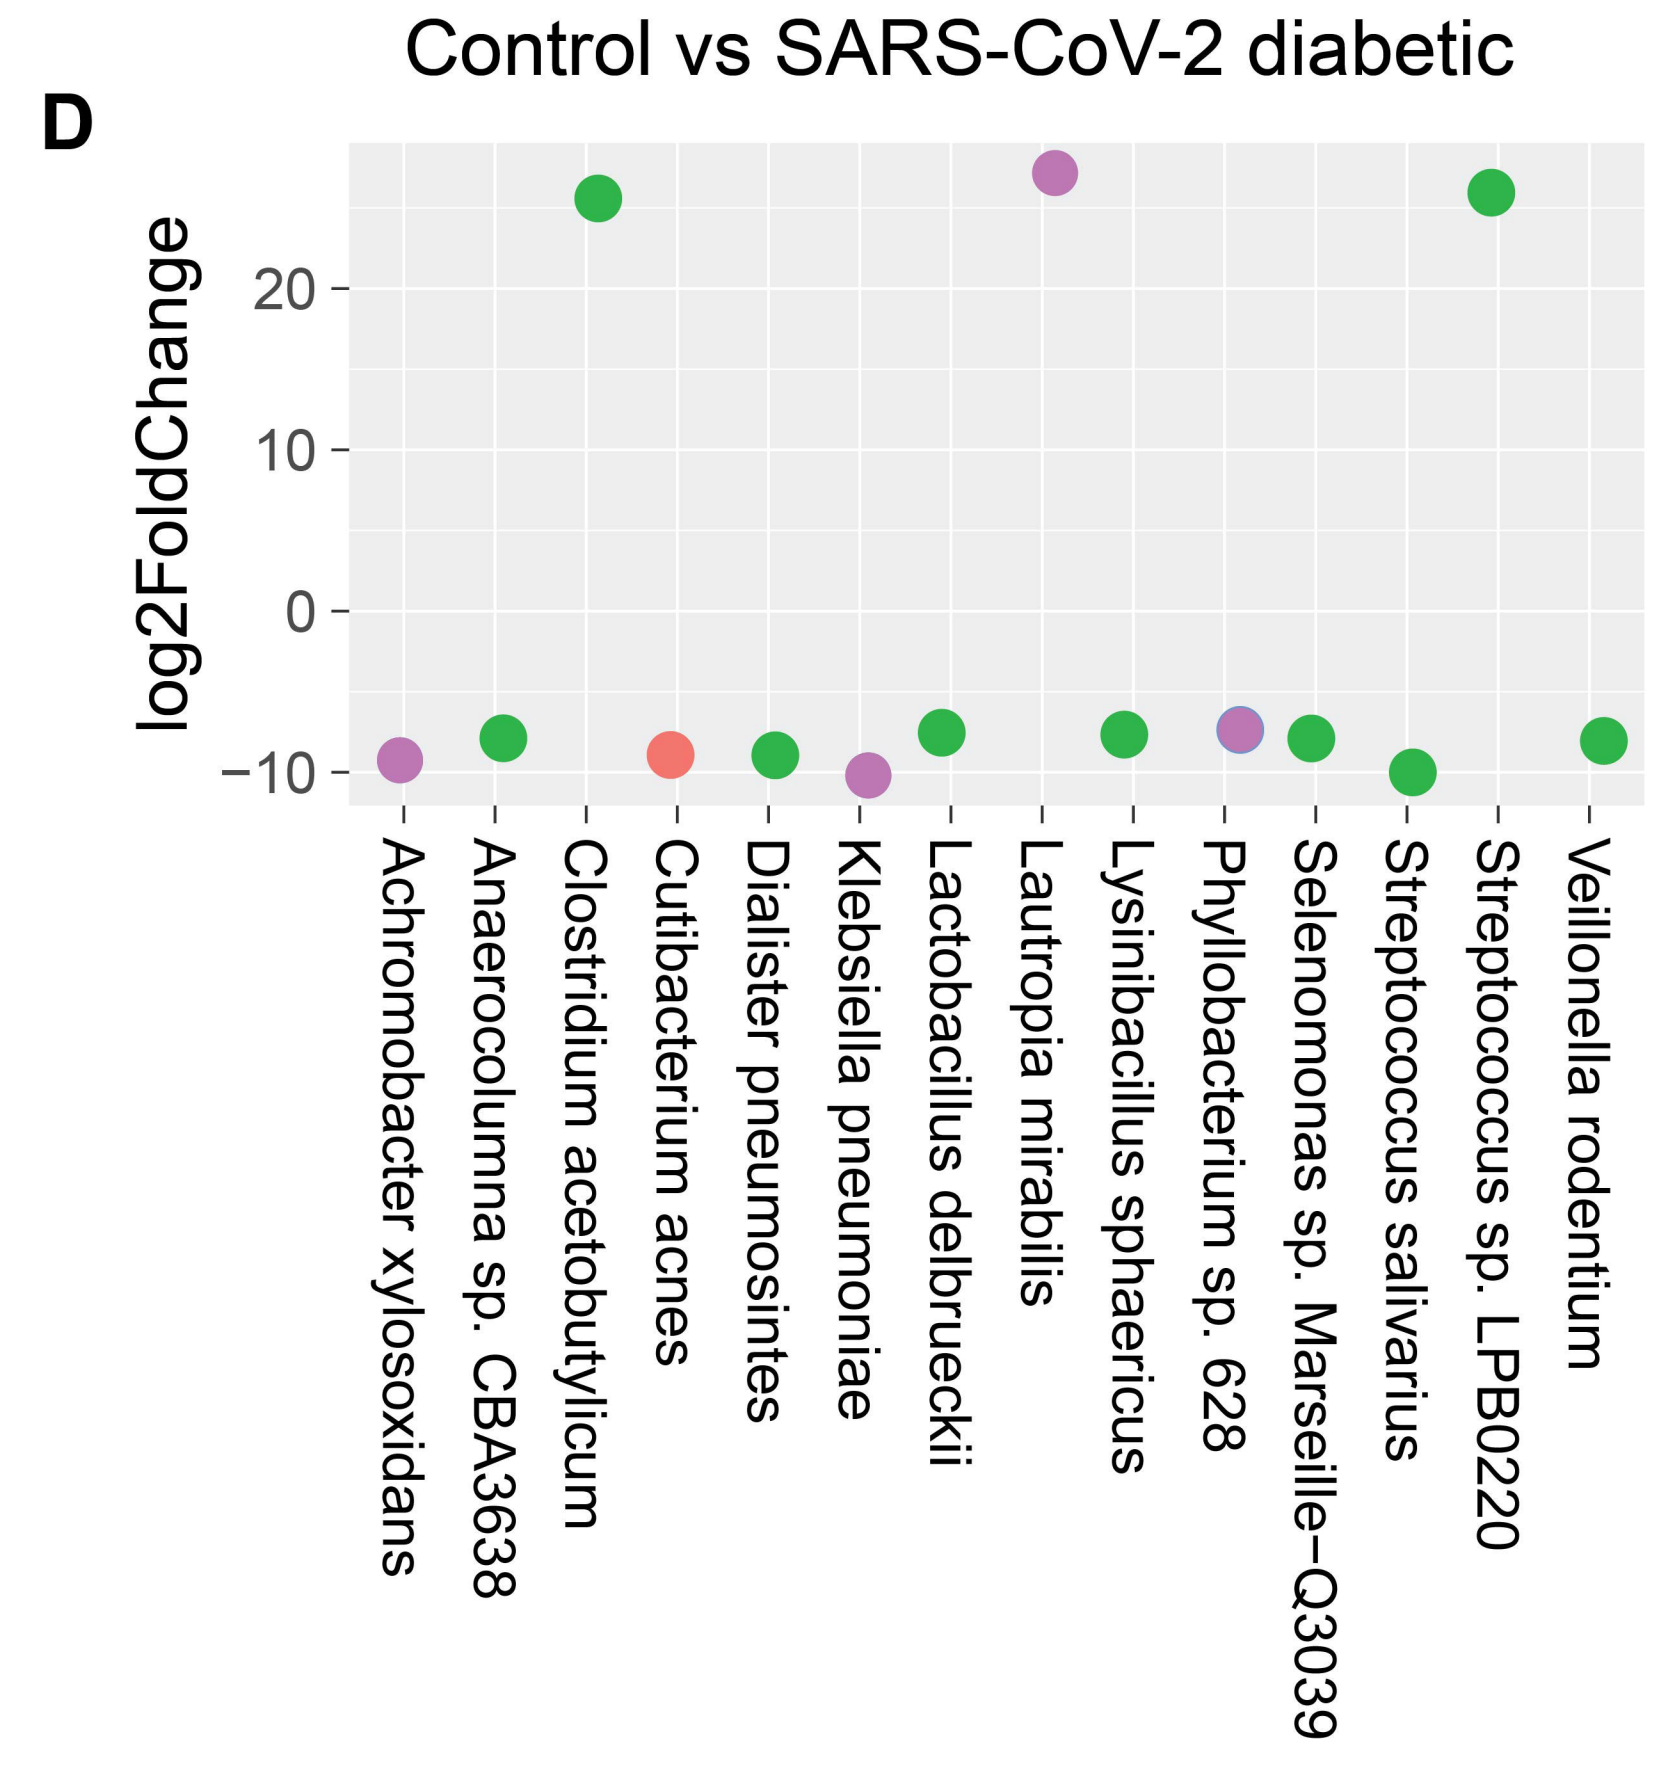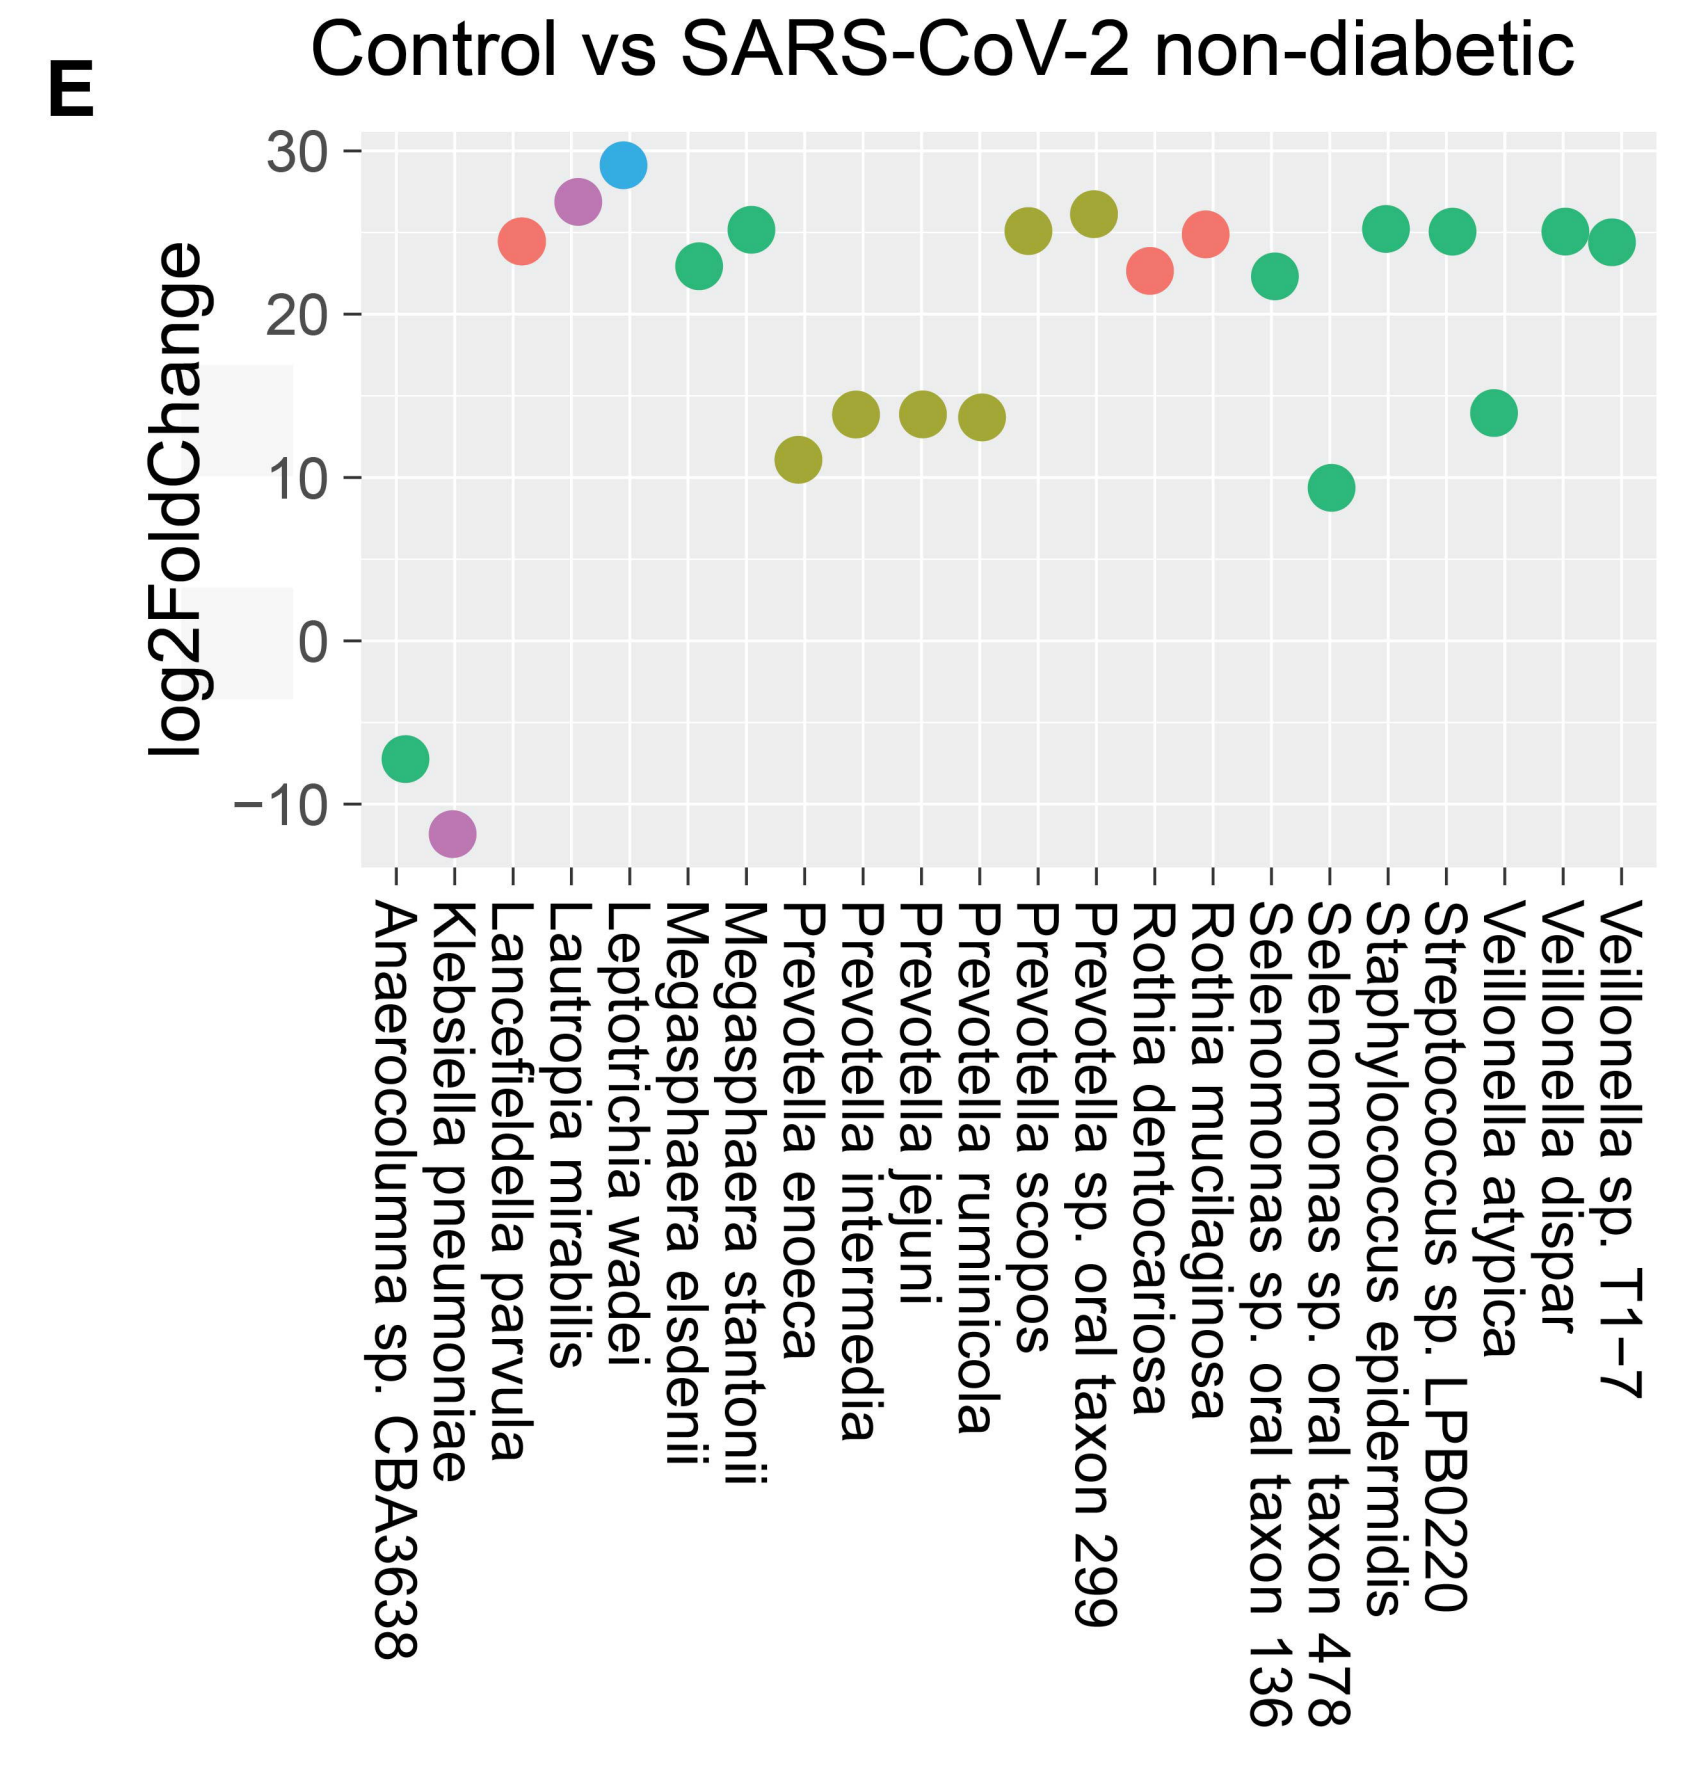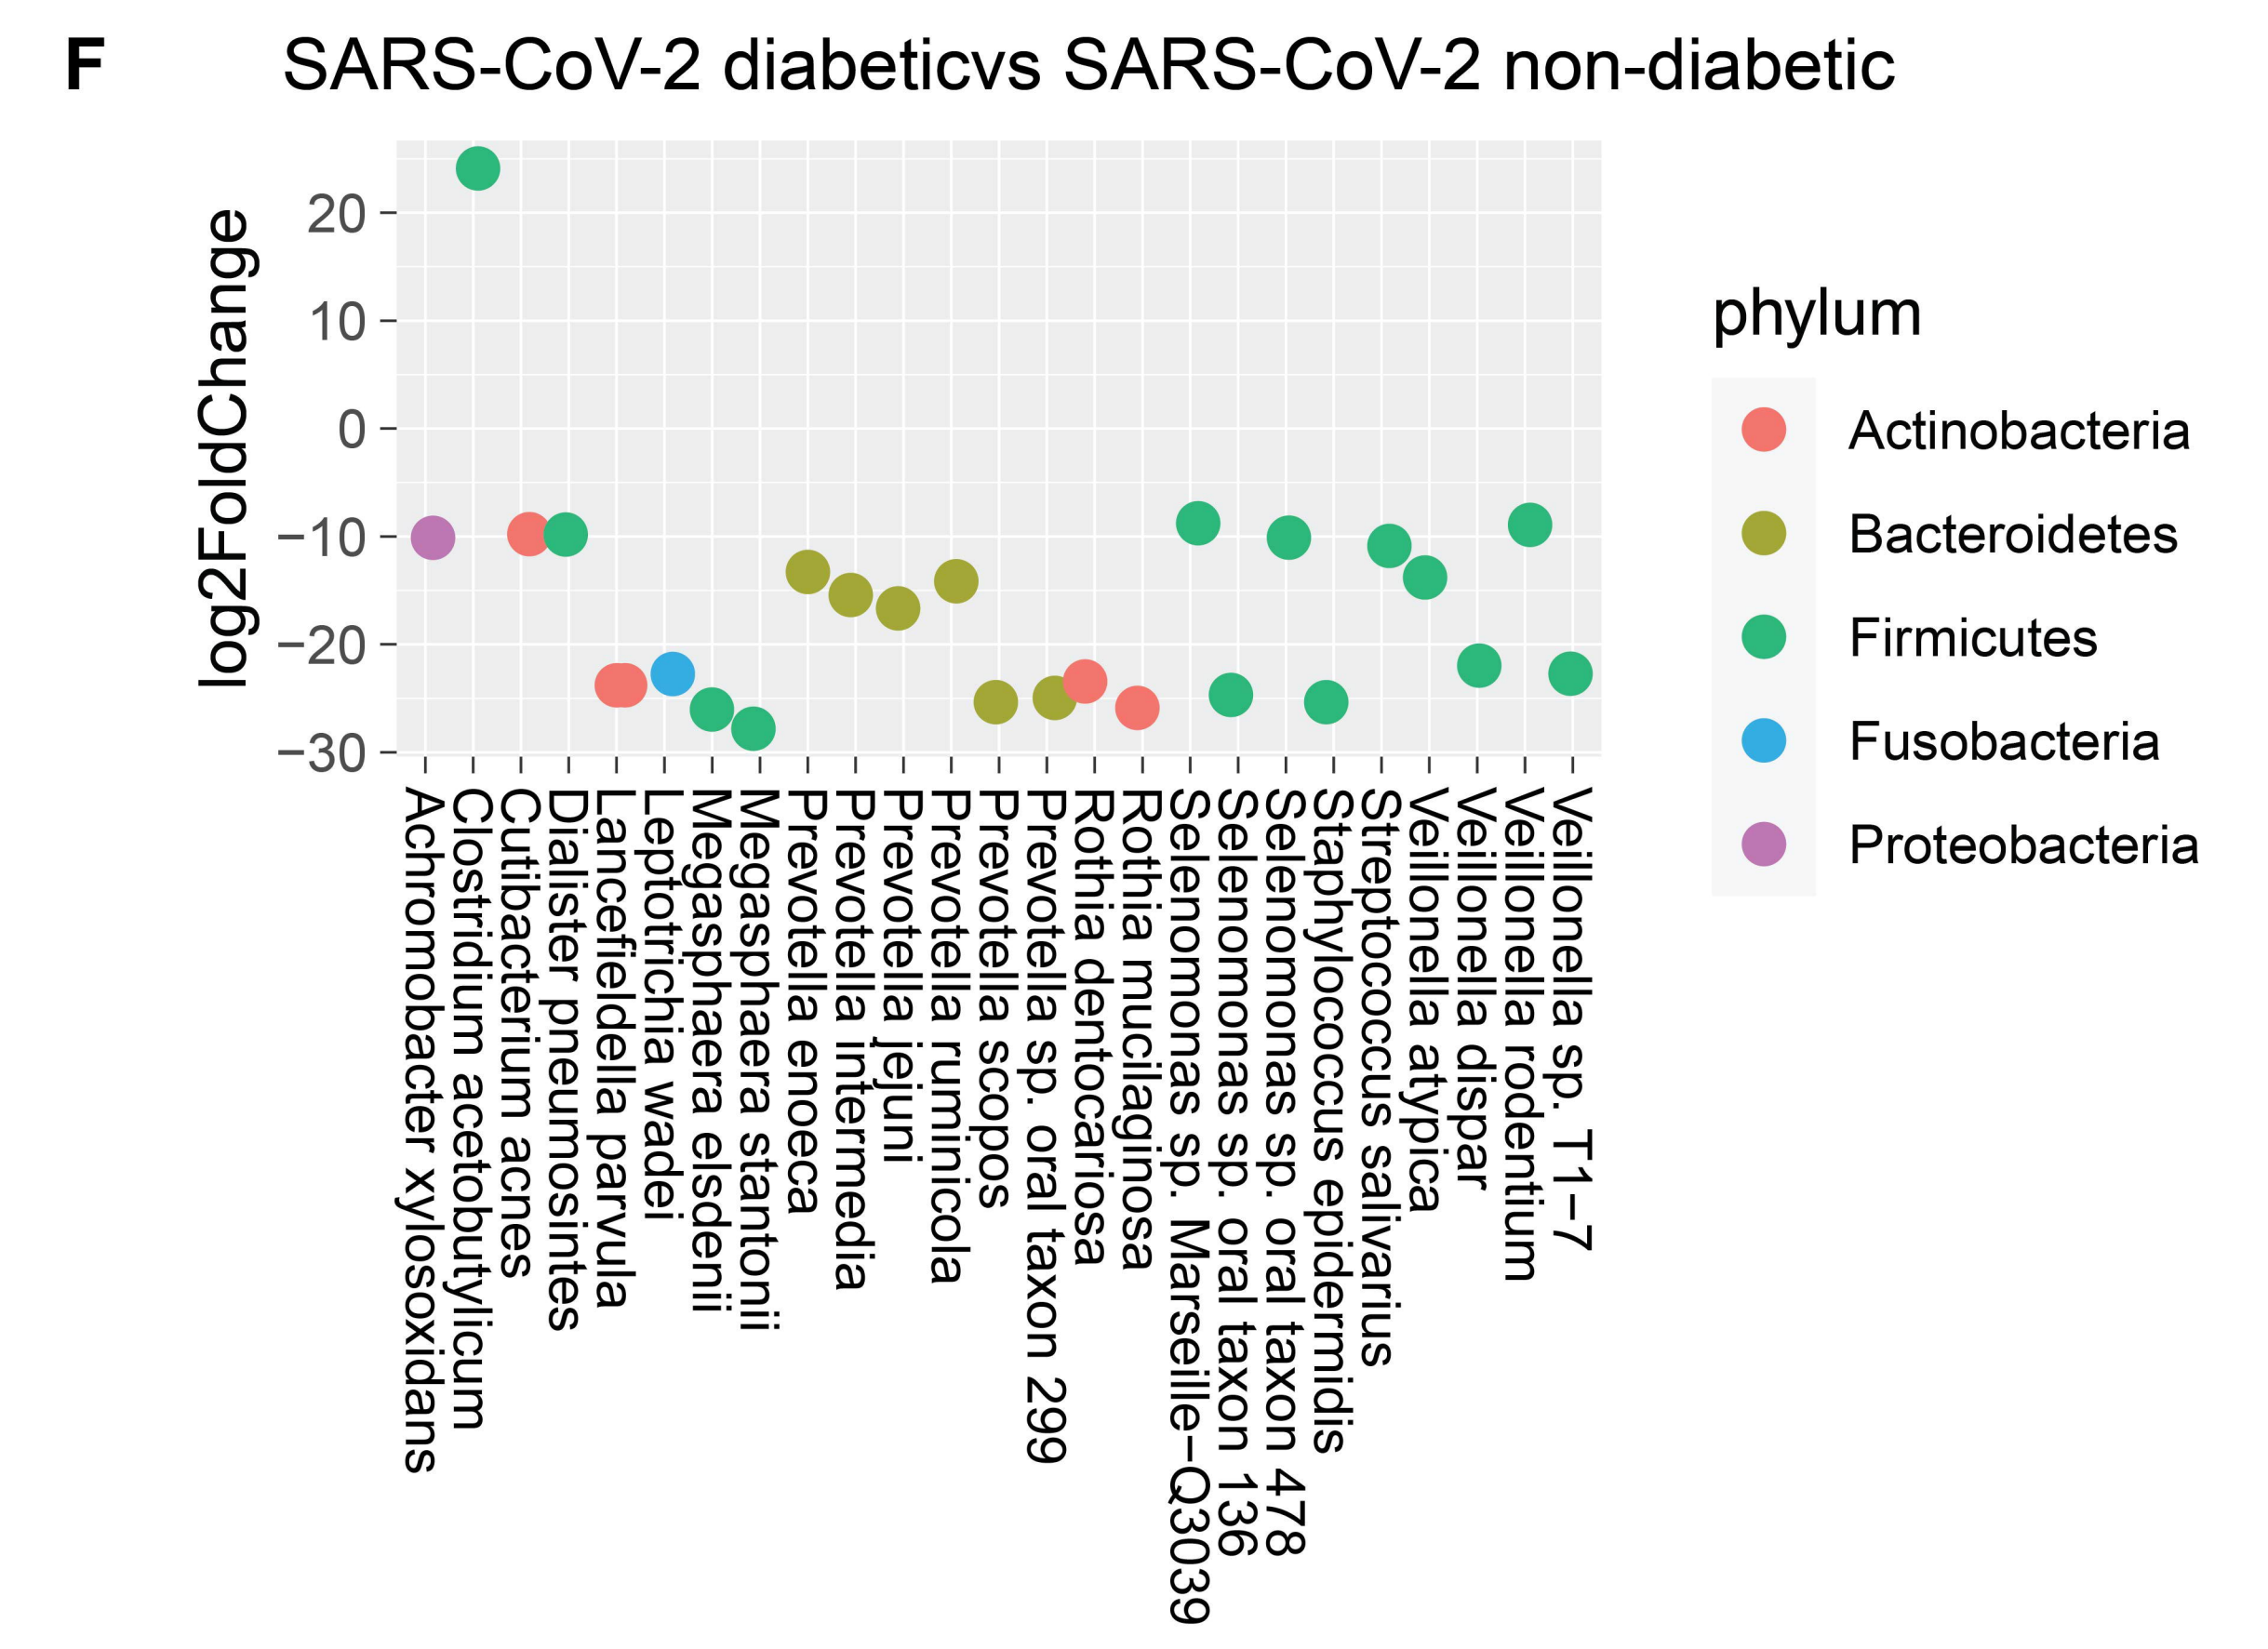

**A**

- Pathogen
- Opportunistic Pathogen
- Positive correlation
- Negative correlation

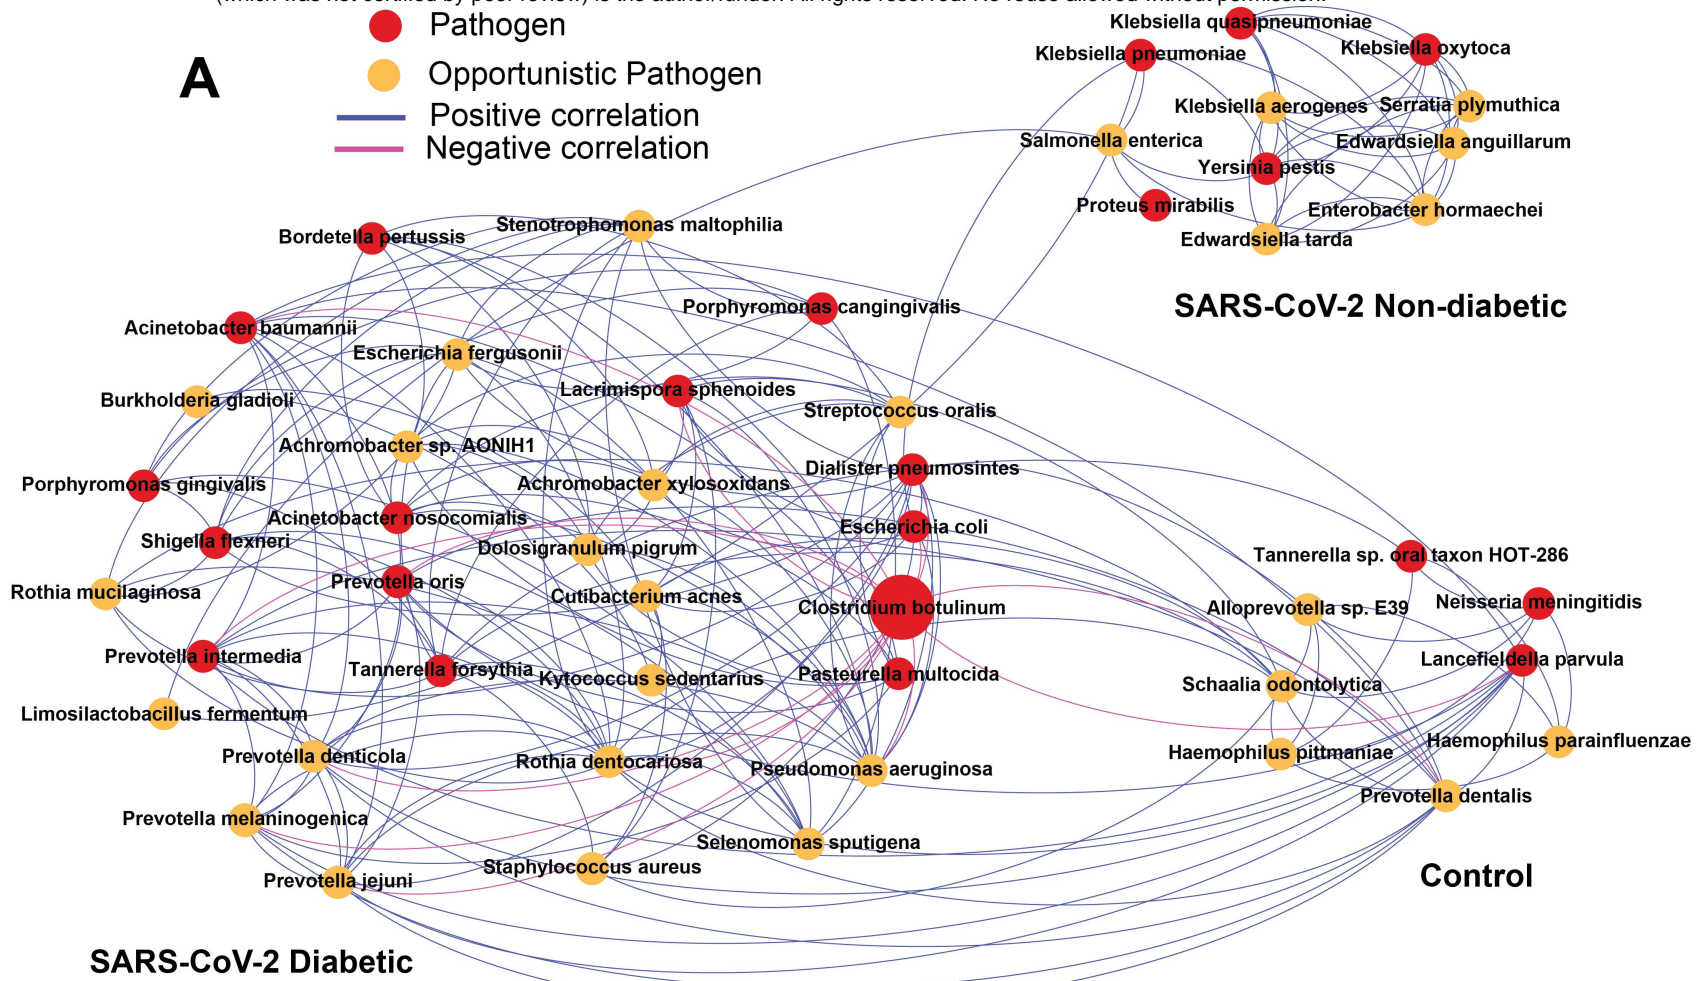

**B**

**SARS-CoV-2 Diabetic**

- Normal flora
- Probiotic
- Positive correlation
- Negative correlation

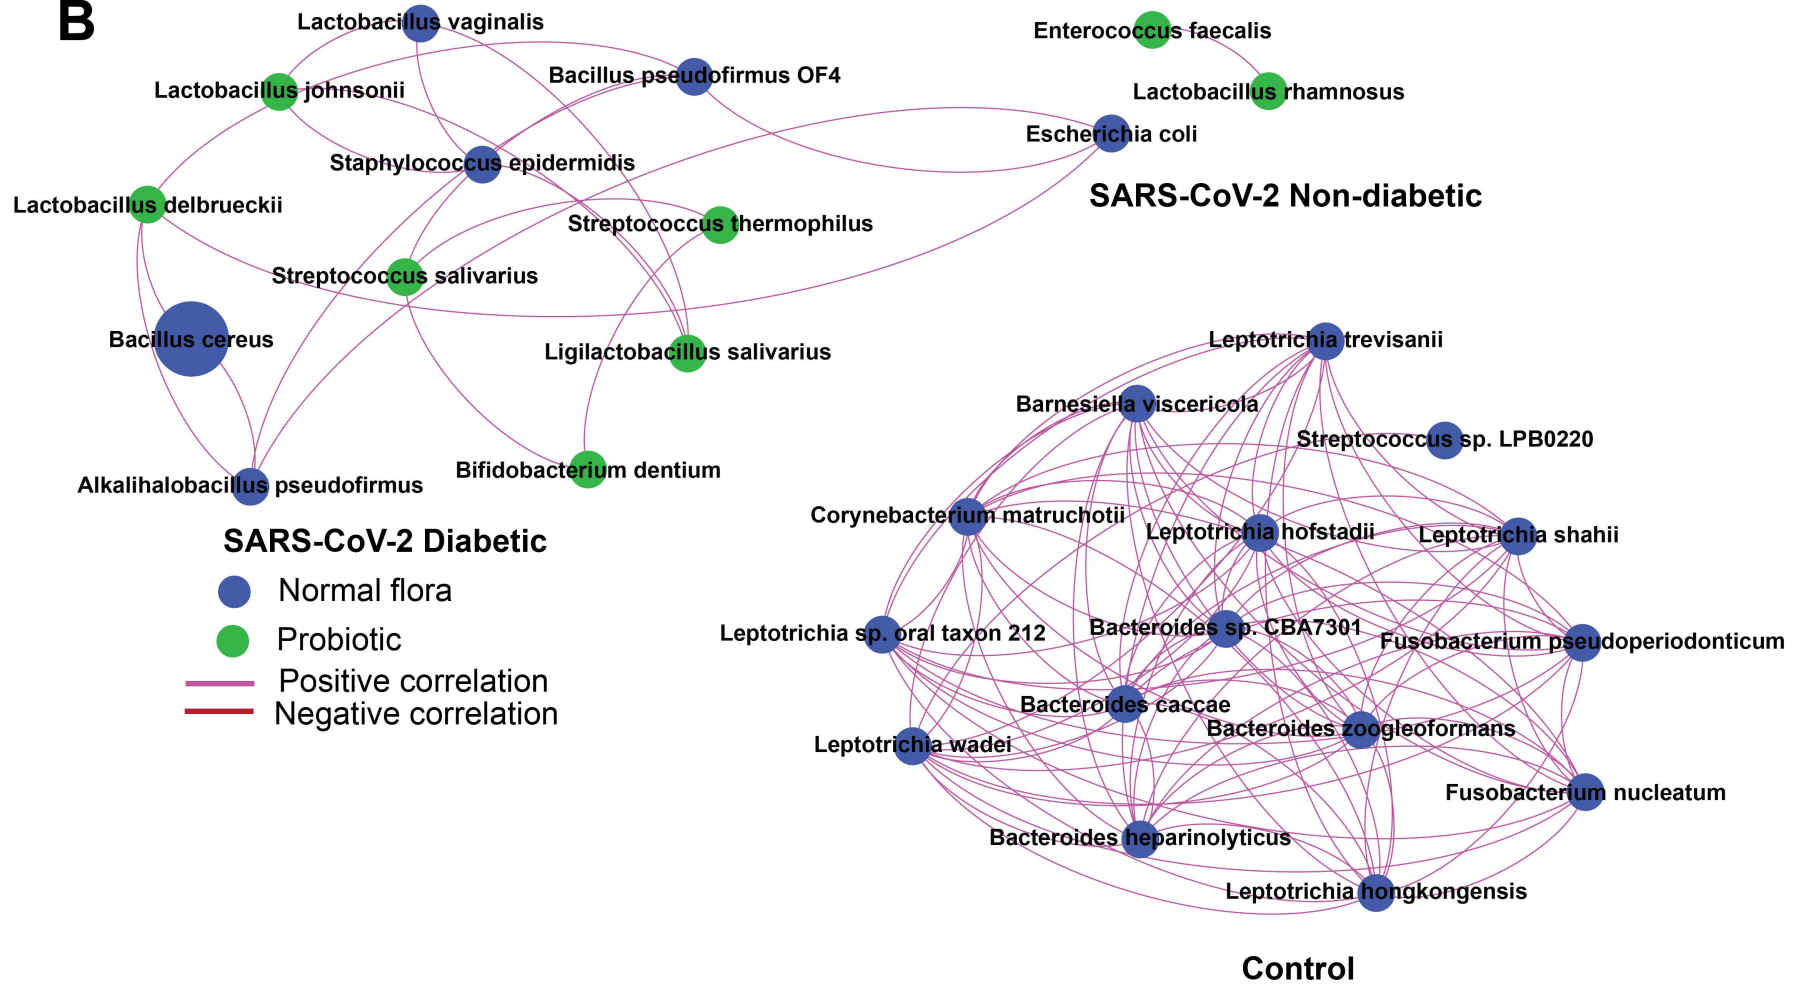



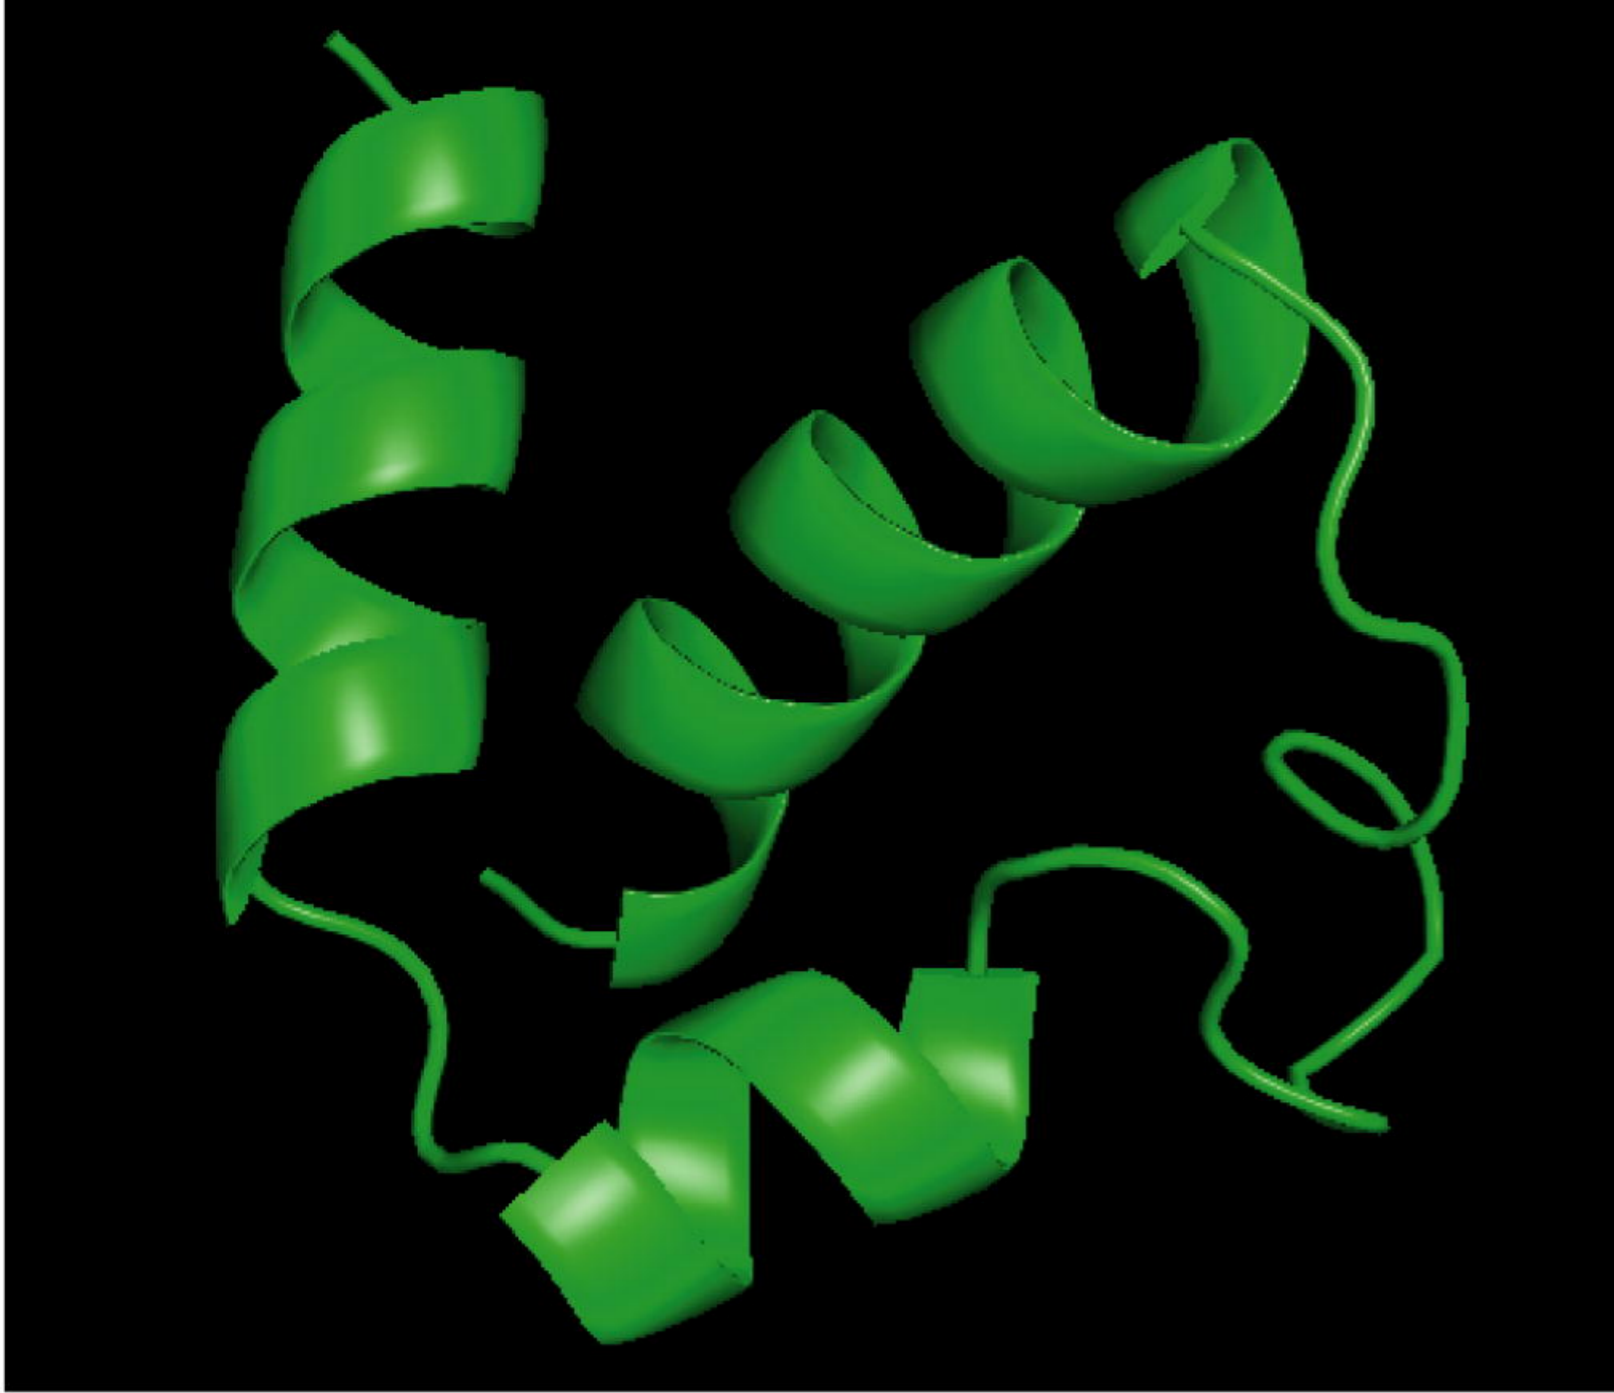

Salivaricin G32\_ *Streptococcus salivarius*

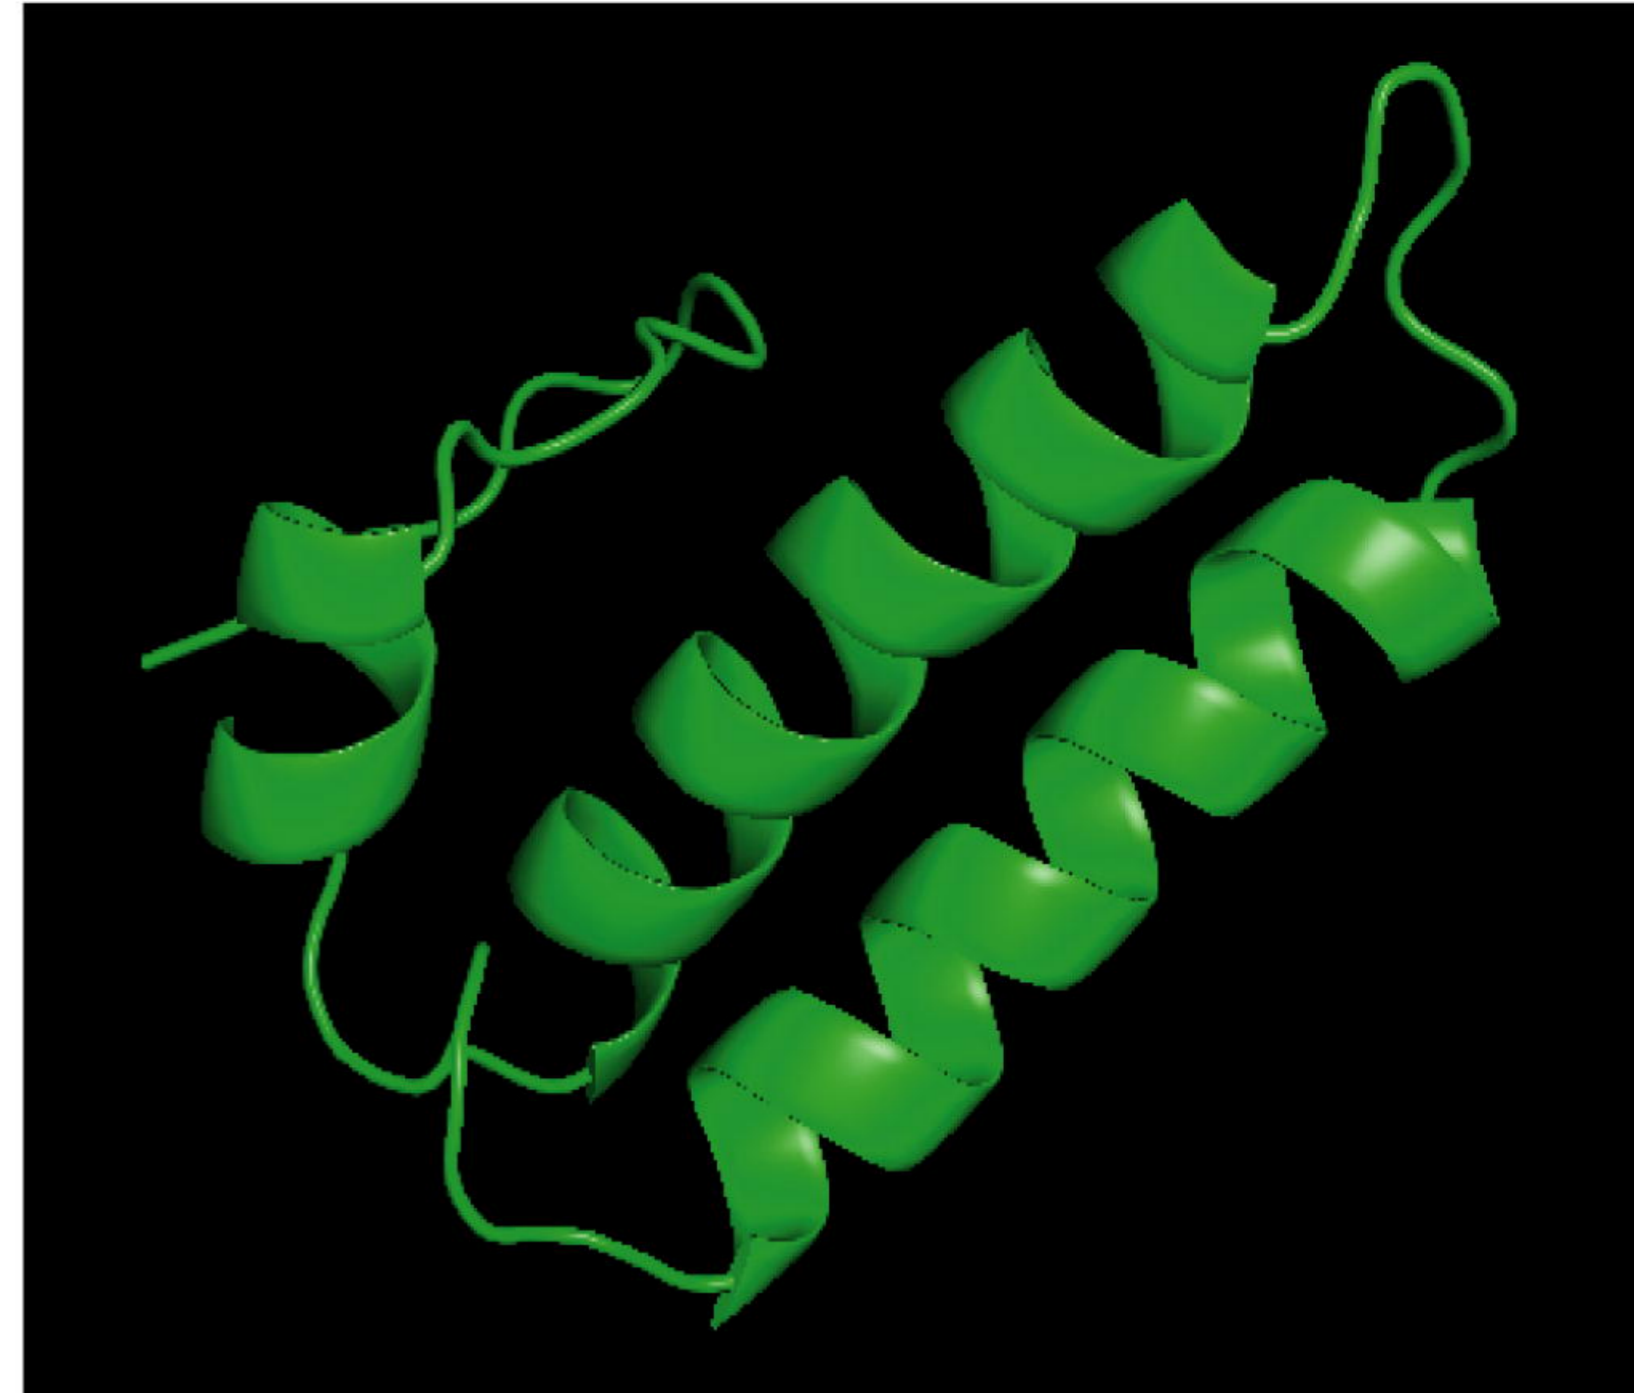

KLD4(alpha)\_ *Ligilactobacillus salivarius*

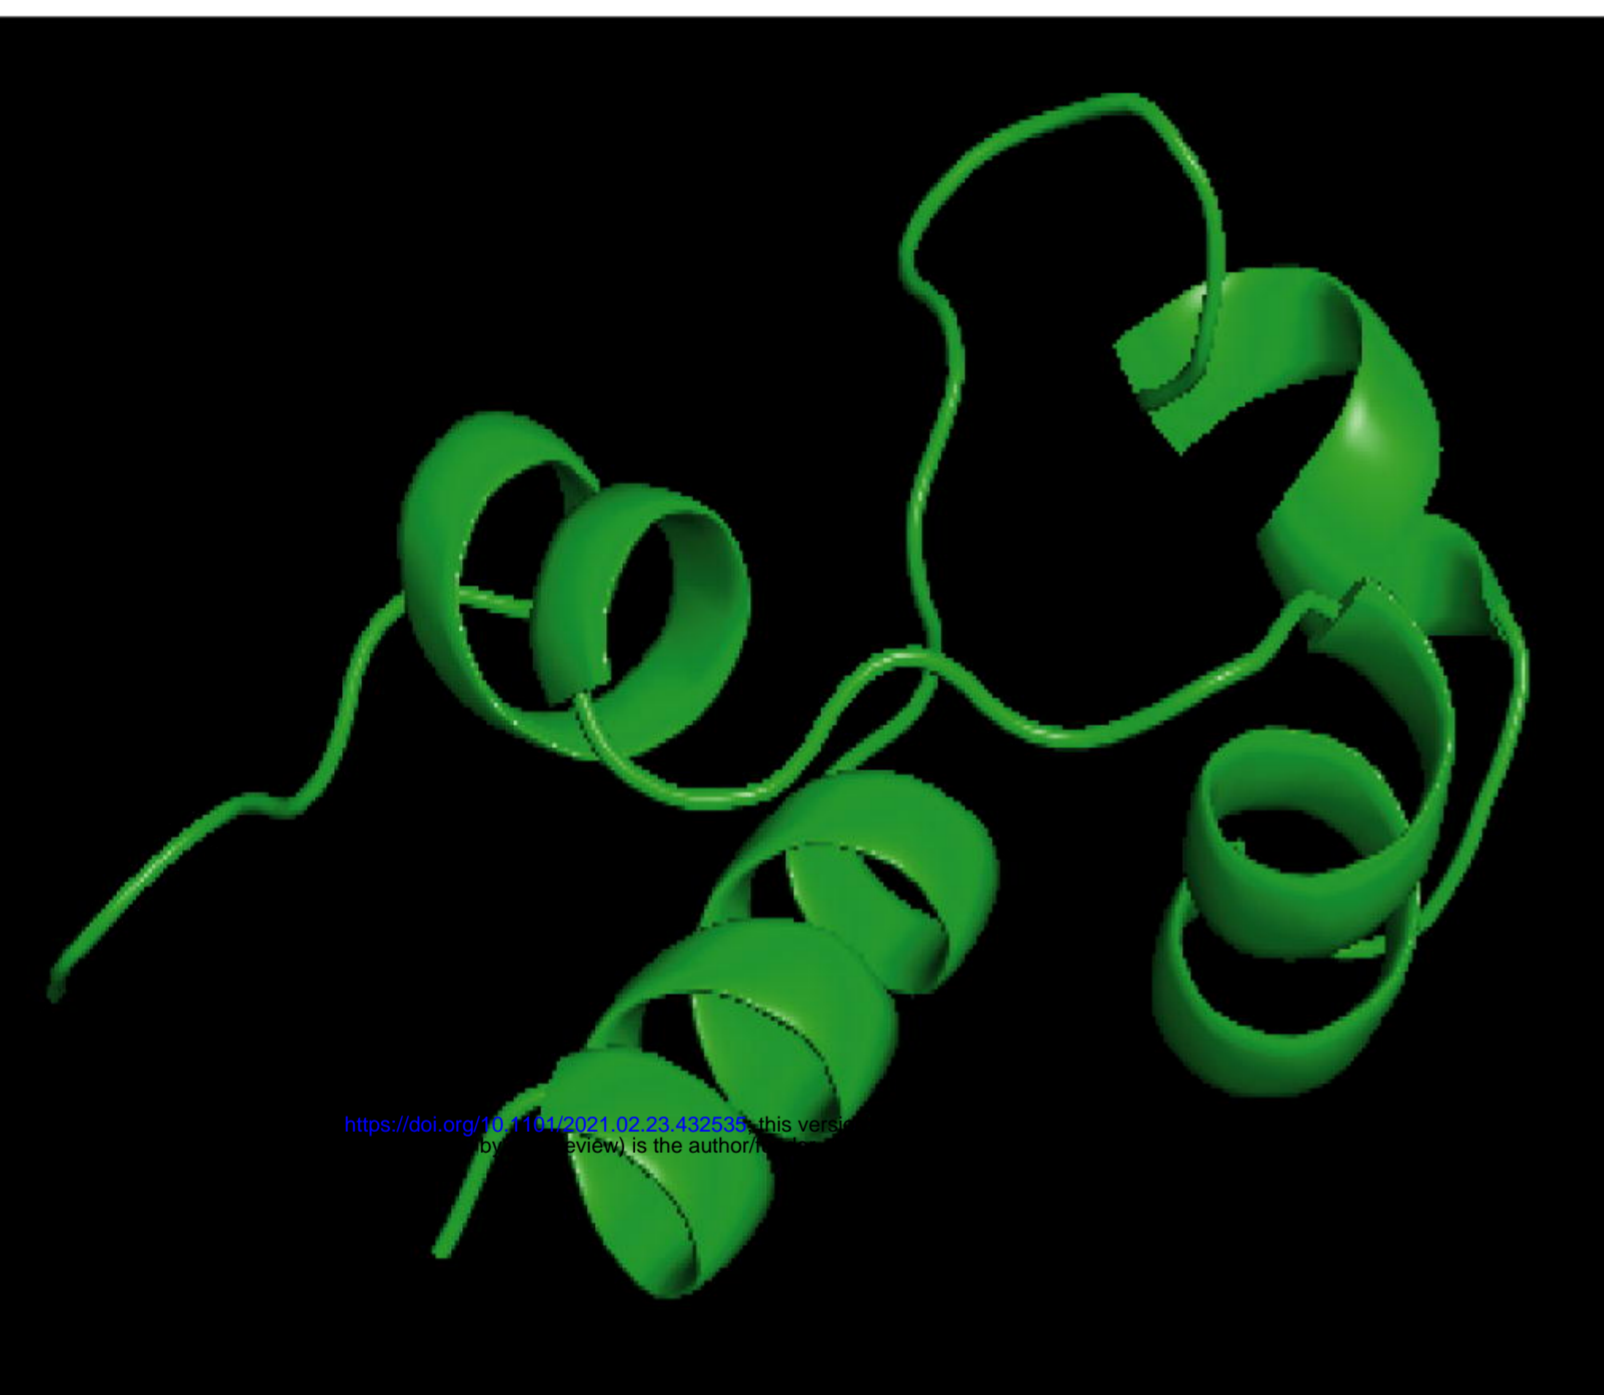

Lactacin F\_ *Lactobacillus johnsonii*

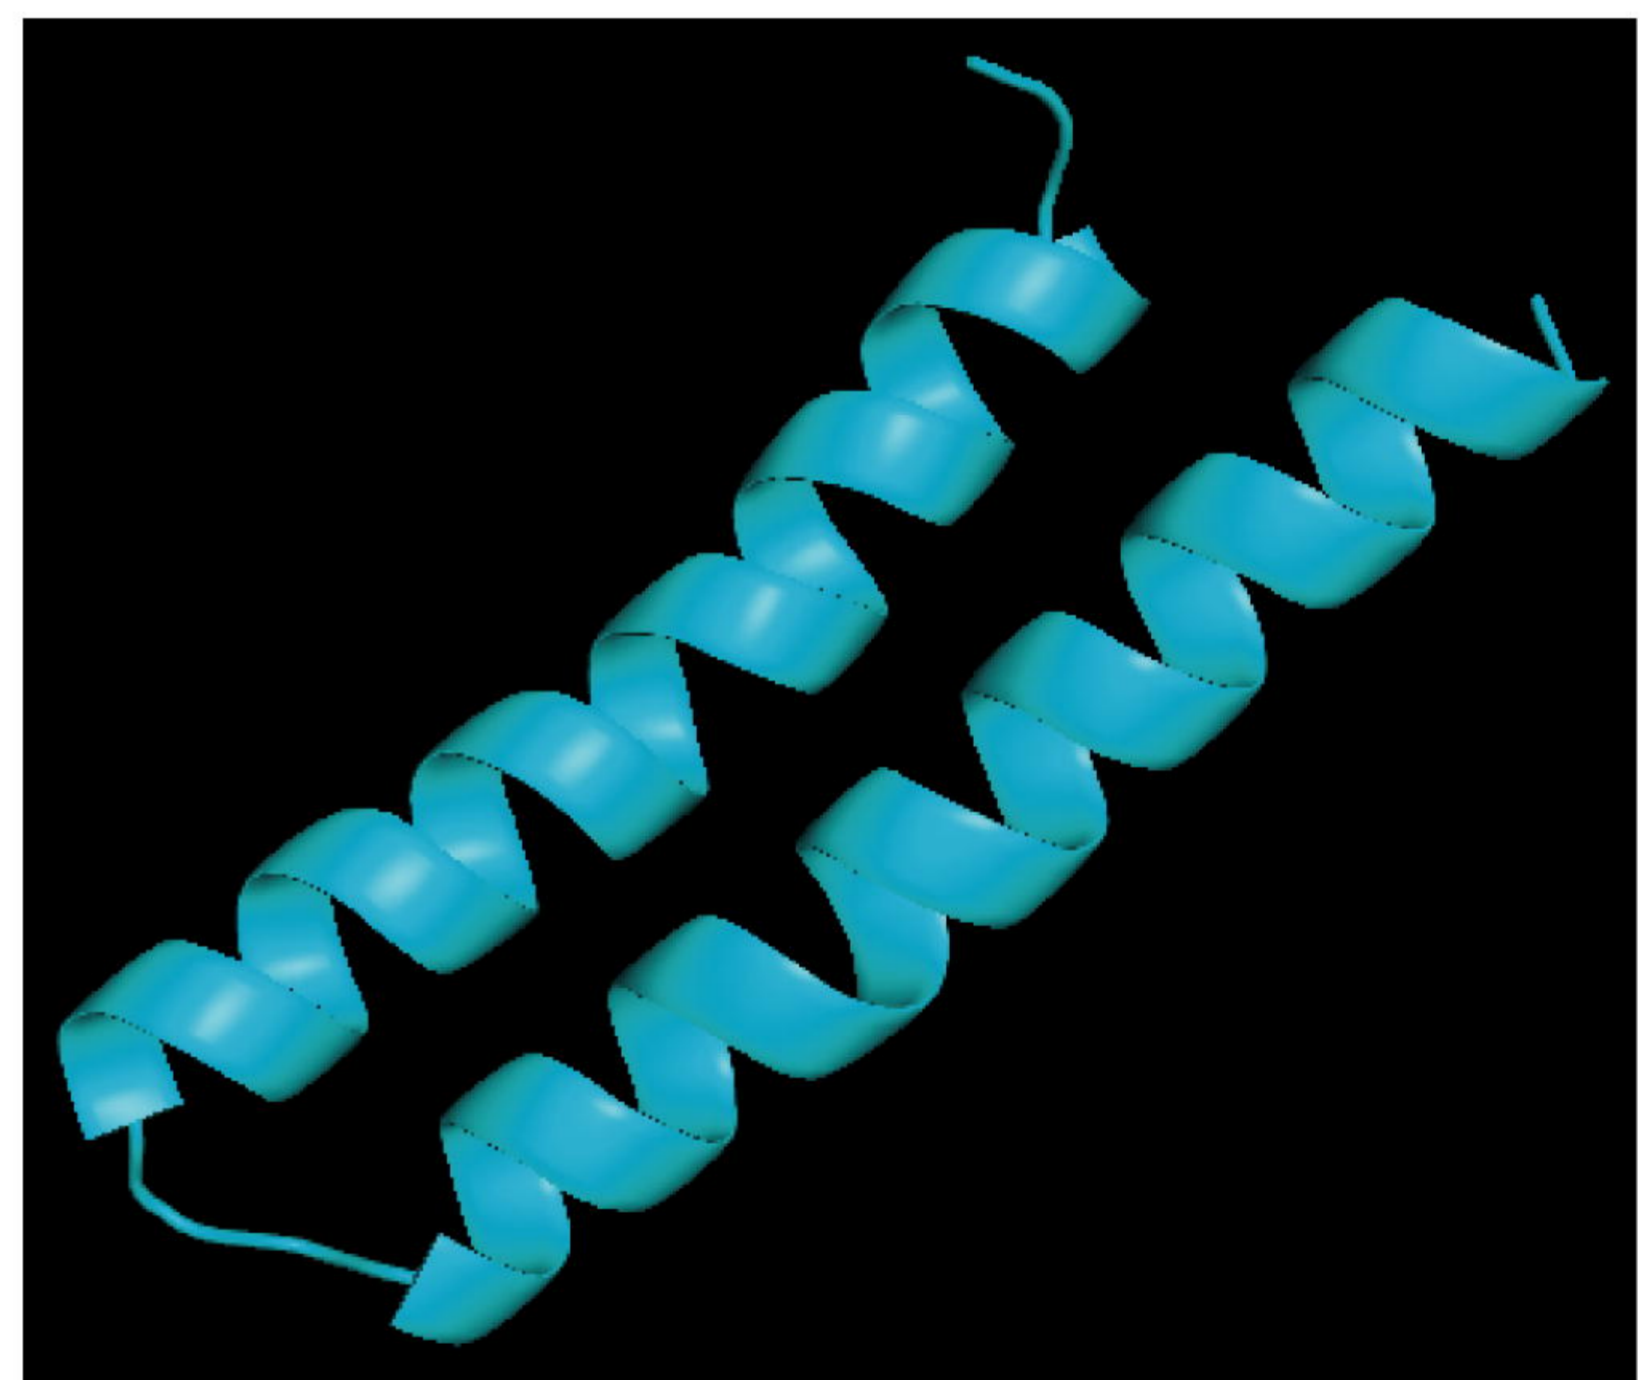

Thermophylin *Streptococcus thermophilus*

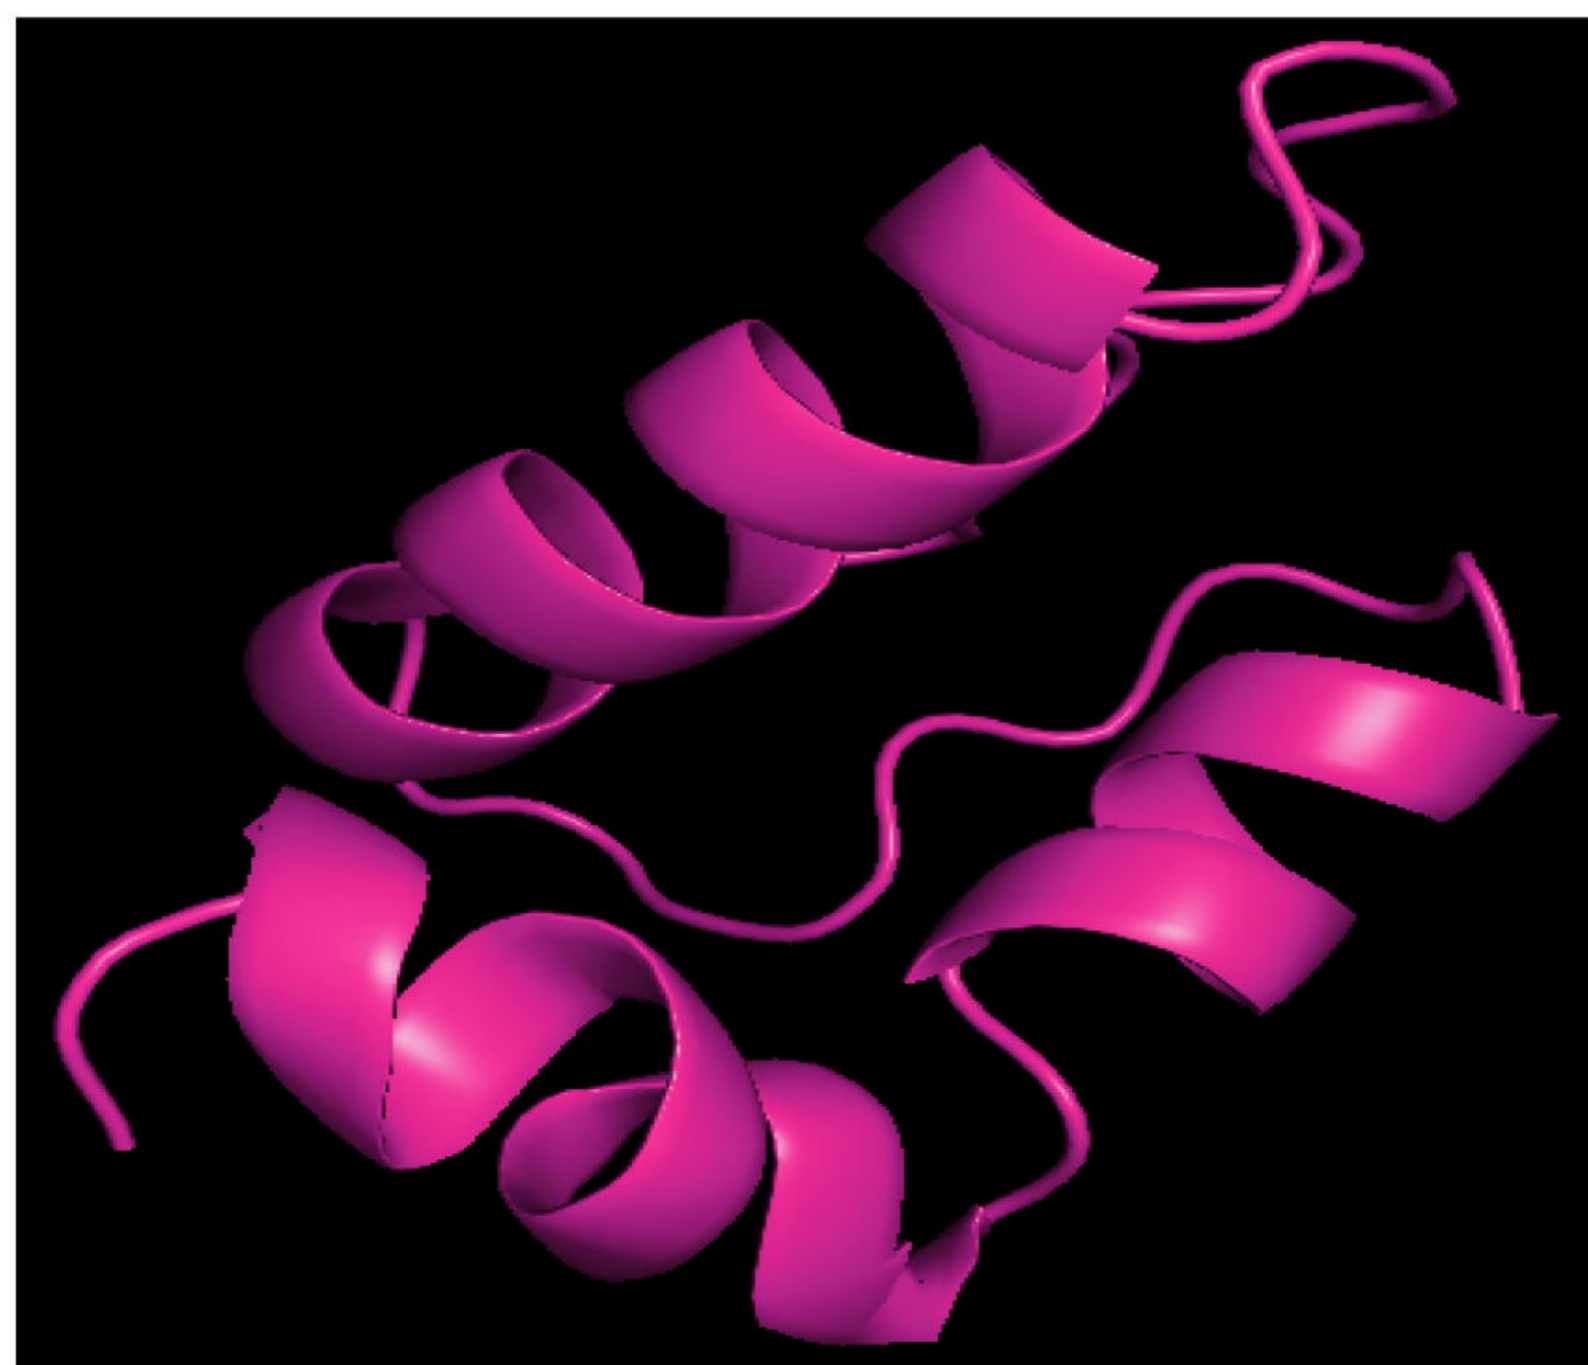

Lactocin 705\_ bacteriocin *Lactilactobacillus*
